# Supplementary material for: 2,5-[C4+C2] Ringtransformation of Pyrylium Salts with ⍺-Sulfinylacetaldehydes
Source: Preprints.org preprint supplement (doi:10.20944/preprints202310.1824.v1), 2023-10-30
Supplement: Supplementary file 1 [file supplementary]

# Supporting information

## 2,5-[C<sub>4</sub>+C<sub>2</sub>] Ringtransformation of Pirylium Salts with $\alpha$ -Sulfinylacetaldehydes

Dominik Bauer<sup>1</sup>, Kathrin Hofmann<sup>2</sup> and Michael Reggelin<sup>1,\*</sup>

Technische Universität Darmstadt, Clemens-Schöpf-Institut für organische Chemie und Biochemie, 64287 Darmstadt, Germany; db@chemie.tu-darmstadt.de

<sup>2</sup> Technische Universität Darmstadt, Eduard-Zintl-Institut für Anorganische und Physikalische Chemie, 64287 Darmstadt, Germany

\* Correspondence: re@chemie.tu-darmstadt.de

## **Table of contents**

NMR spectra of compounds **10a-p**

Crystallographic data of compound **10a**

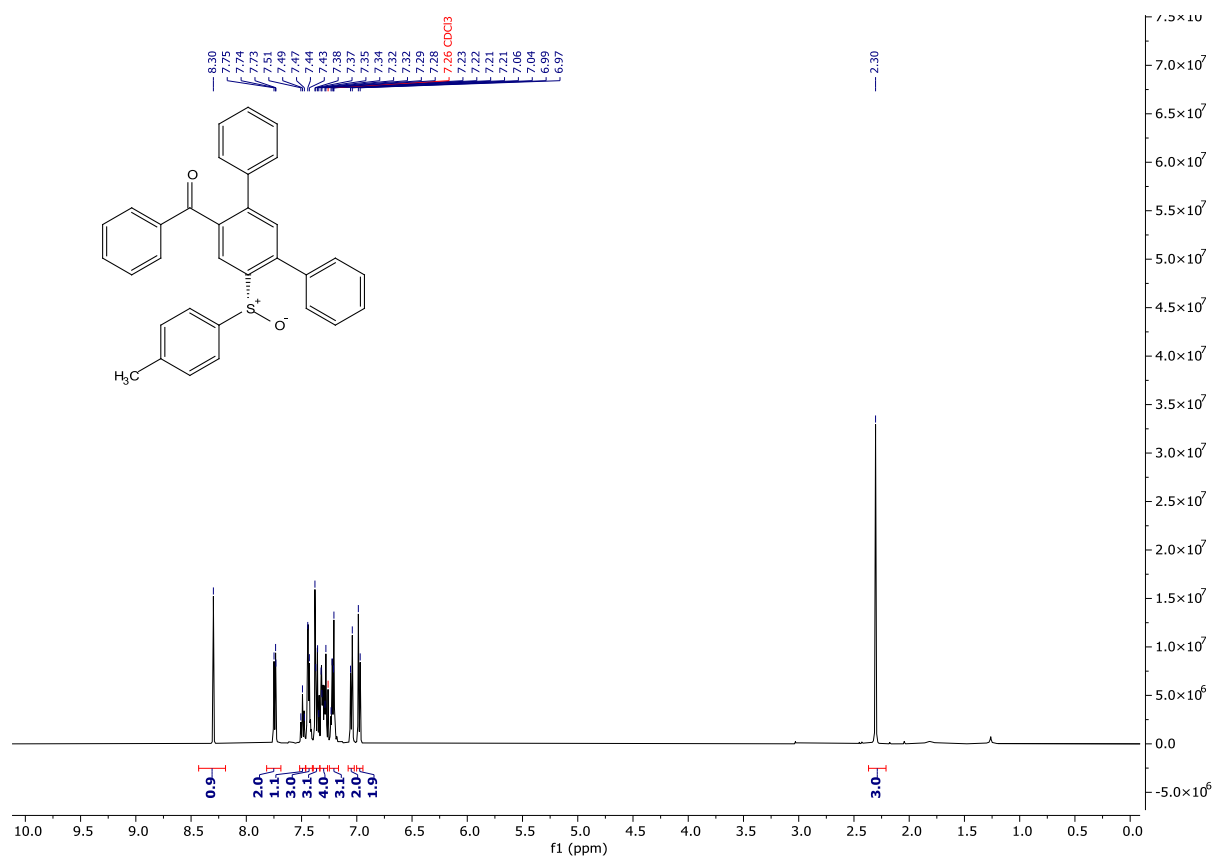

Figure 1. <sup>1</sup>H NMR (500 MHz, Chloroform-*d*) of compound 10a.

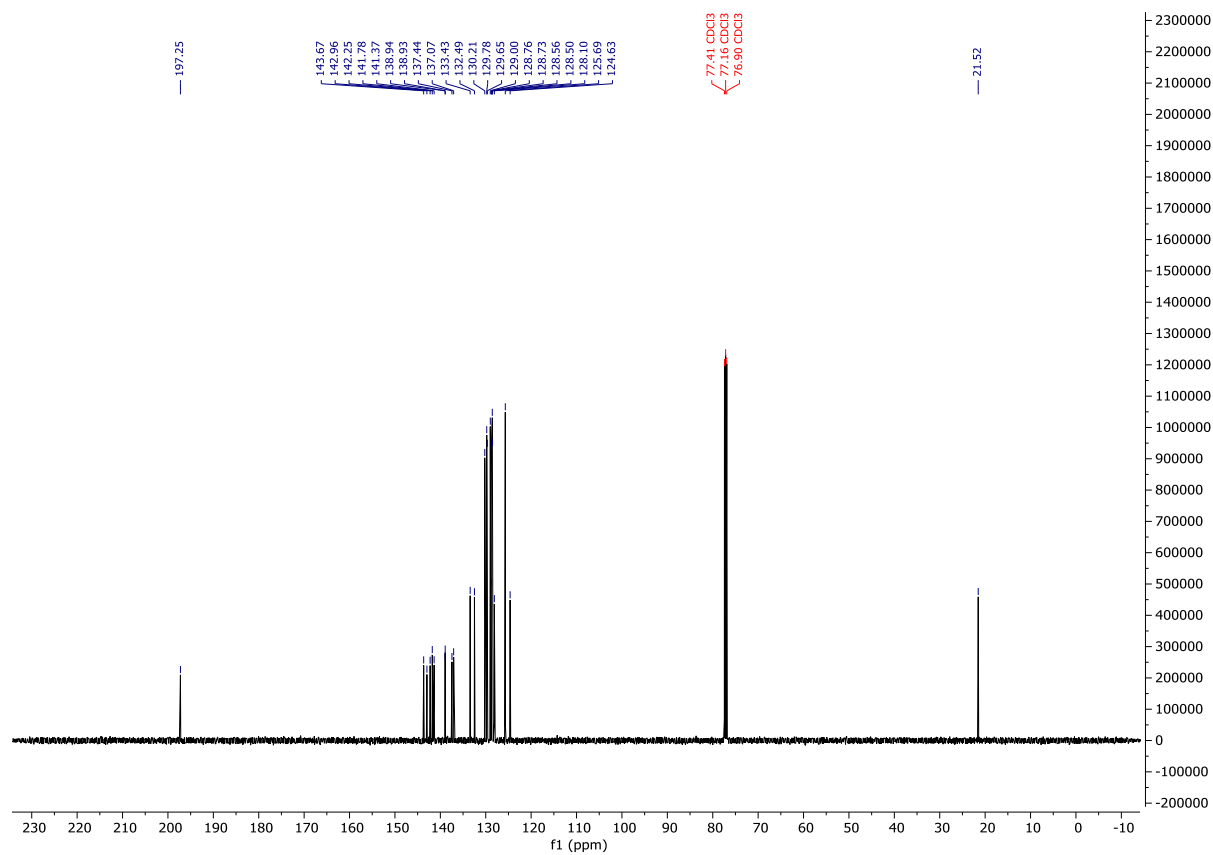

Figure 2. <sup>13</sup>C NMR (126 MHz, Chloroform-*d*) of compound 10a.

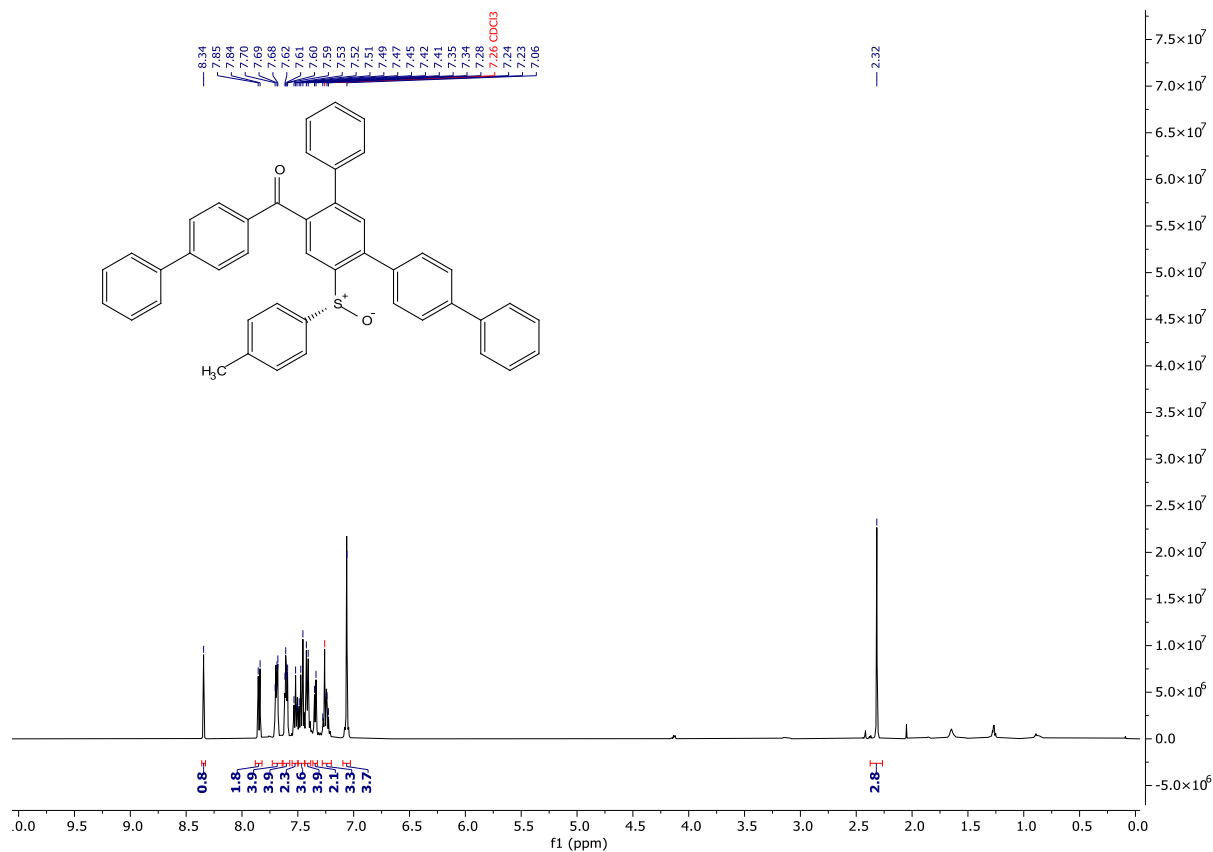

Figure 3. <sup>1</sup>H NMR (500 MHz, Chloroform-*d*) of compound 10b.

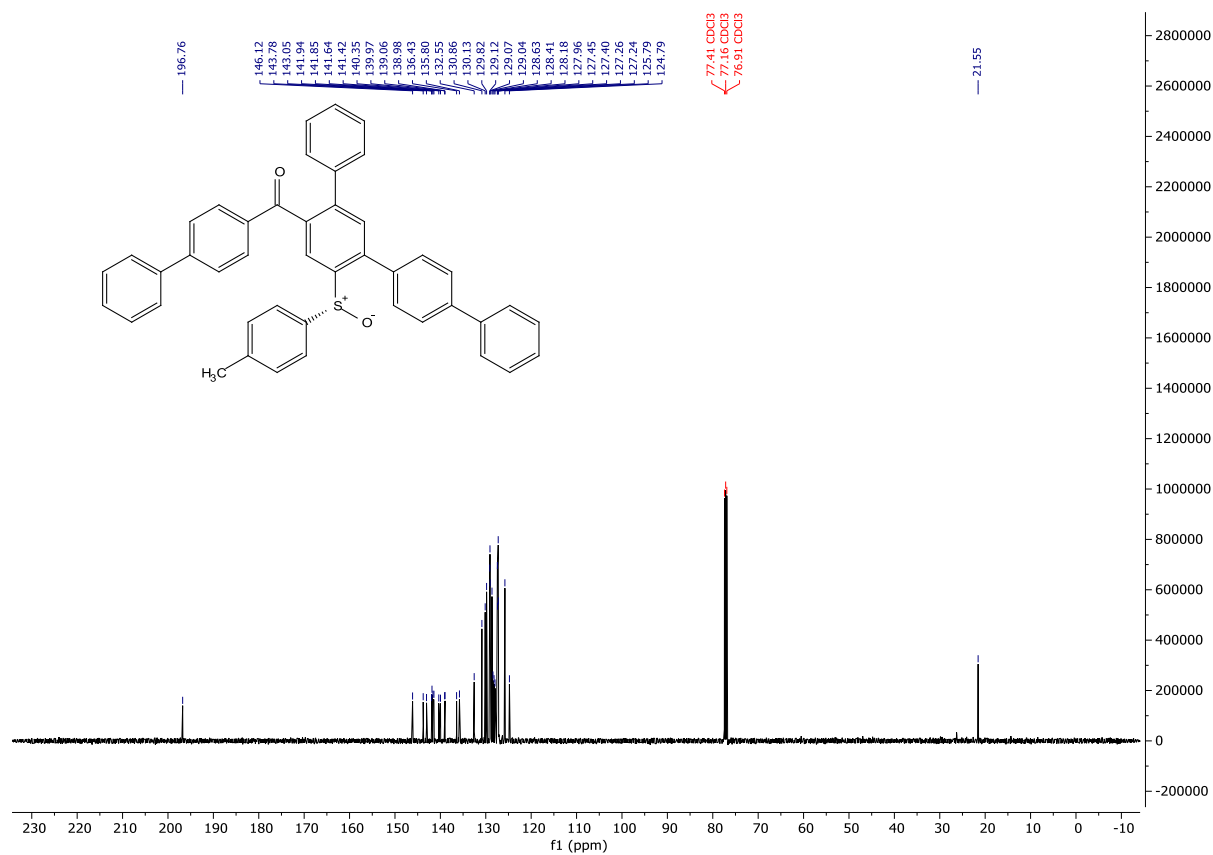

Figure 4. <sup>13</sup>C NMR (126 MHz, Chloroform-*d*) of compound 10b.

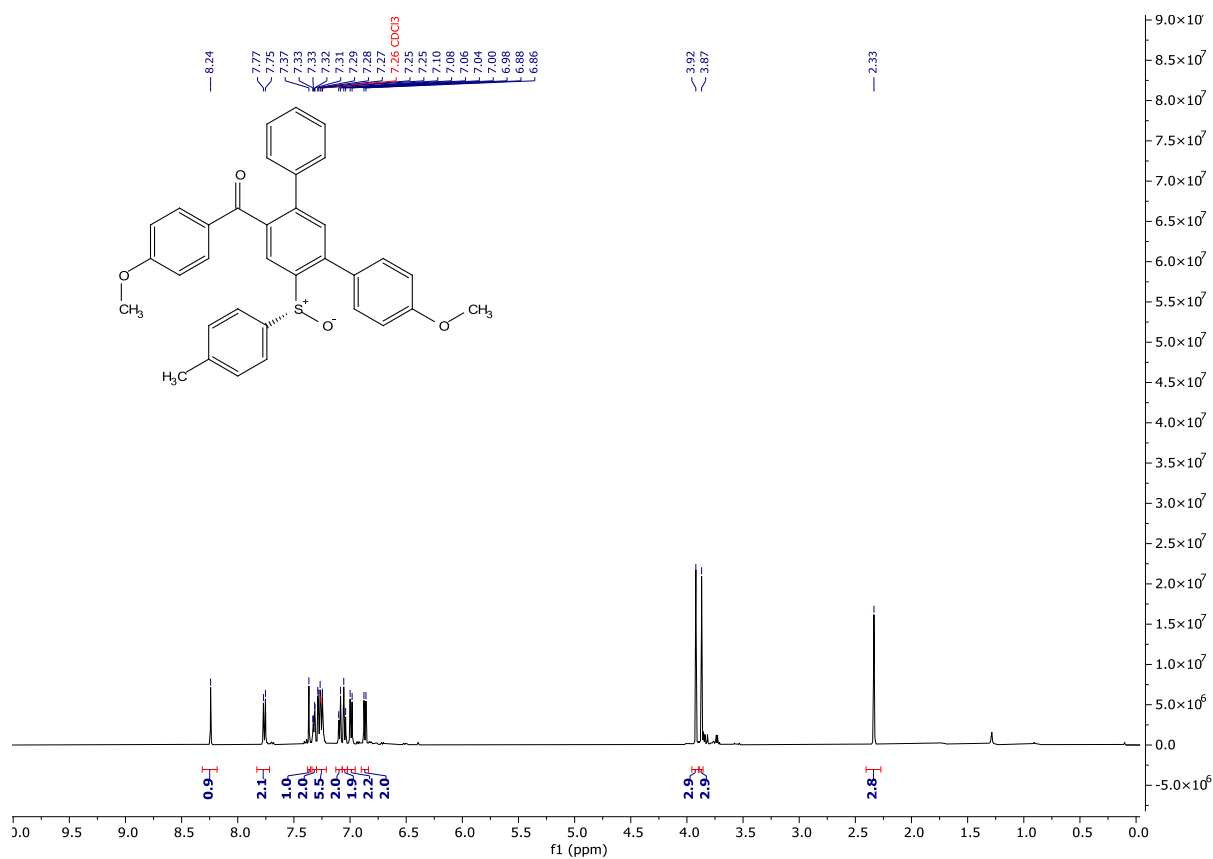

Figure 5. <sup>1</sup>H NMR (500 MHz, Chloroform-*d*) of compound 10c.

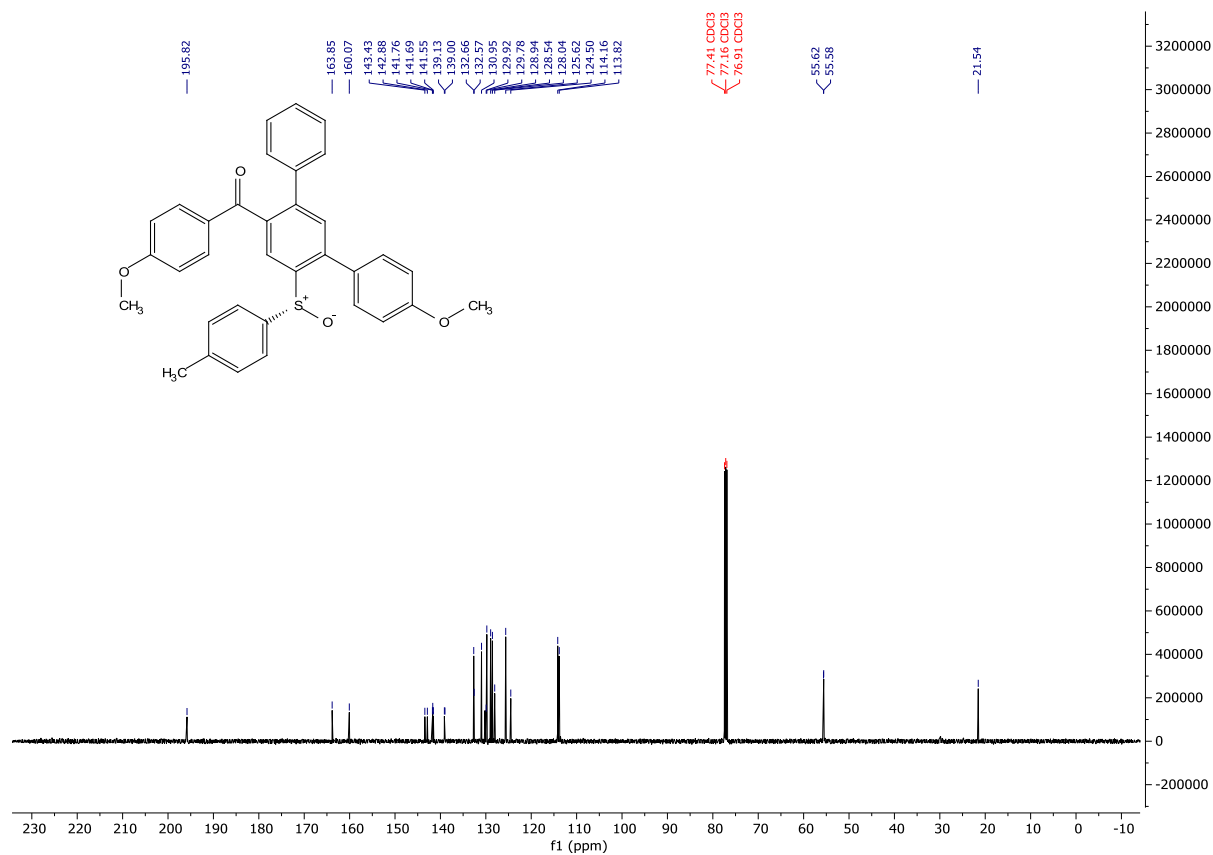

Figure 6. <sup>13</sup>C NMR (126 MHz, Chloroform-*d*) of compound 10c.

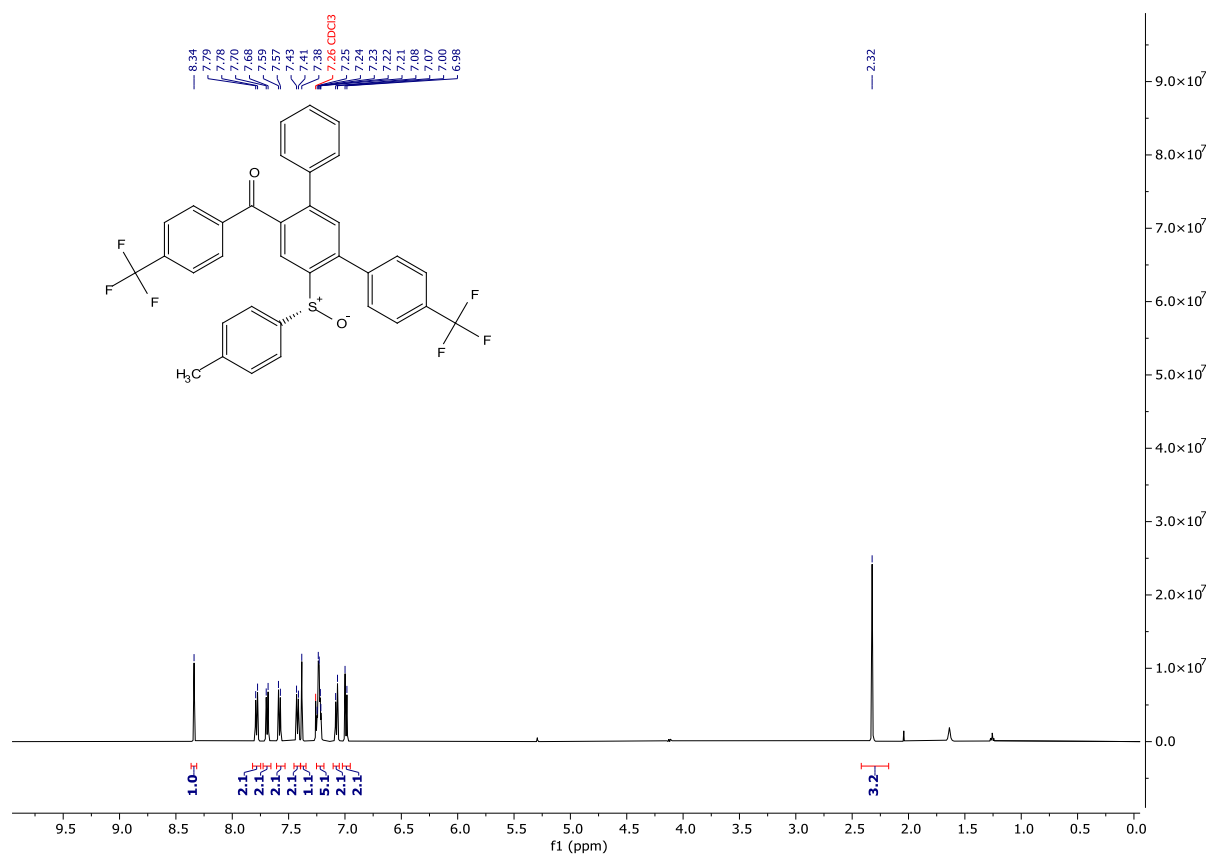

Figure 7. <sup>1</sup>H NMR (500 MHz, Chloroform-*d*) of compound 10d.

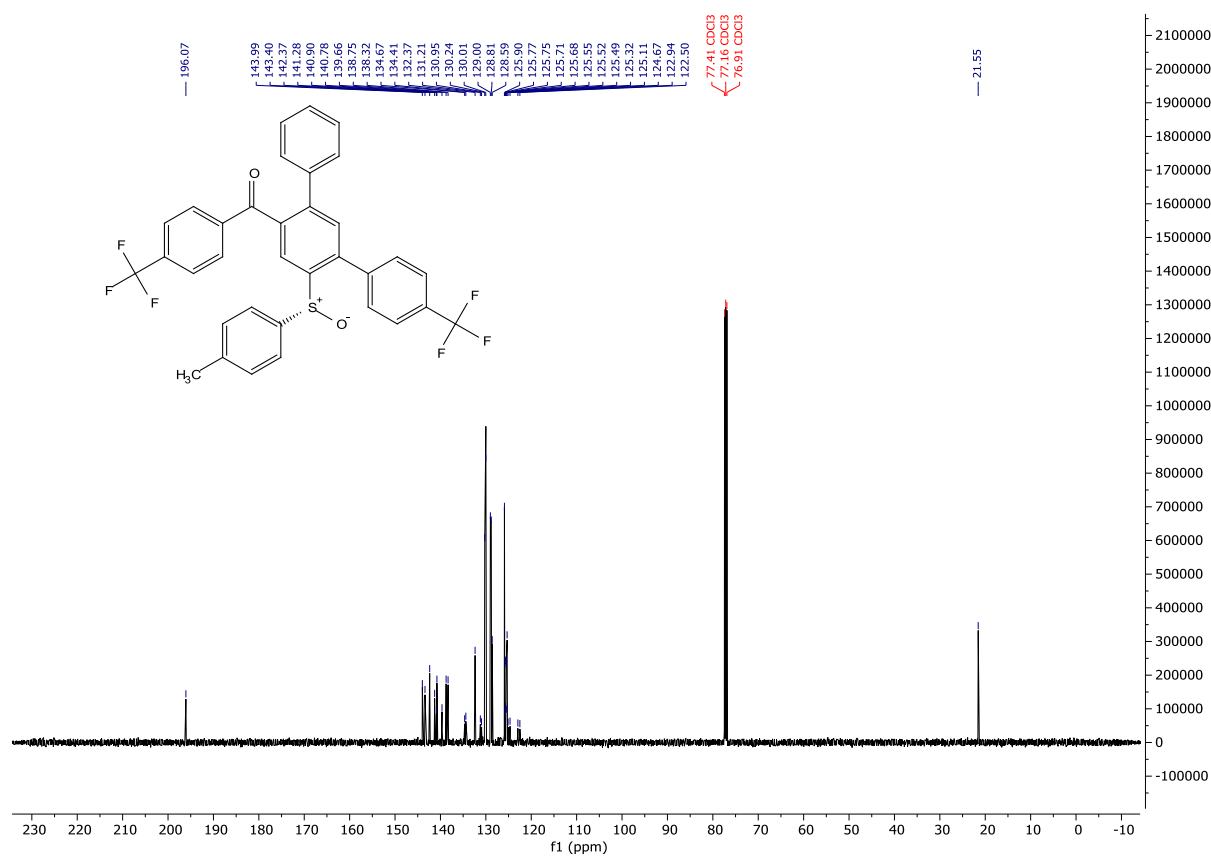

Figure 8. <sup>13</sup>C NMR (126 MHz, Chloroform-*d*) of compound 10d.

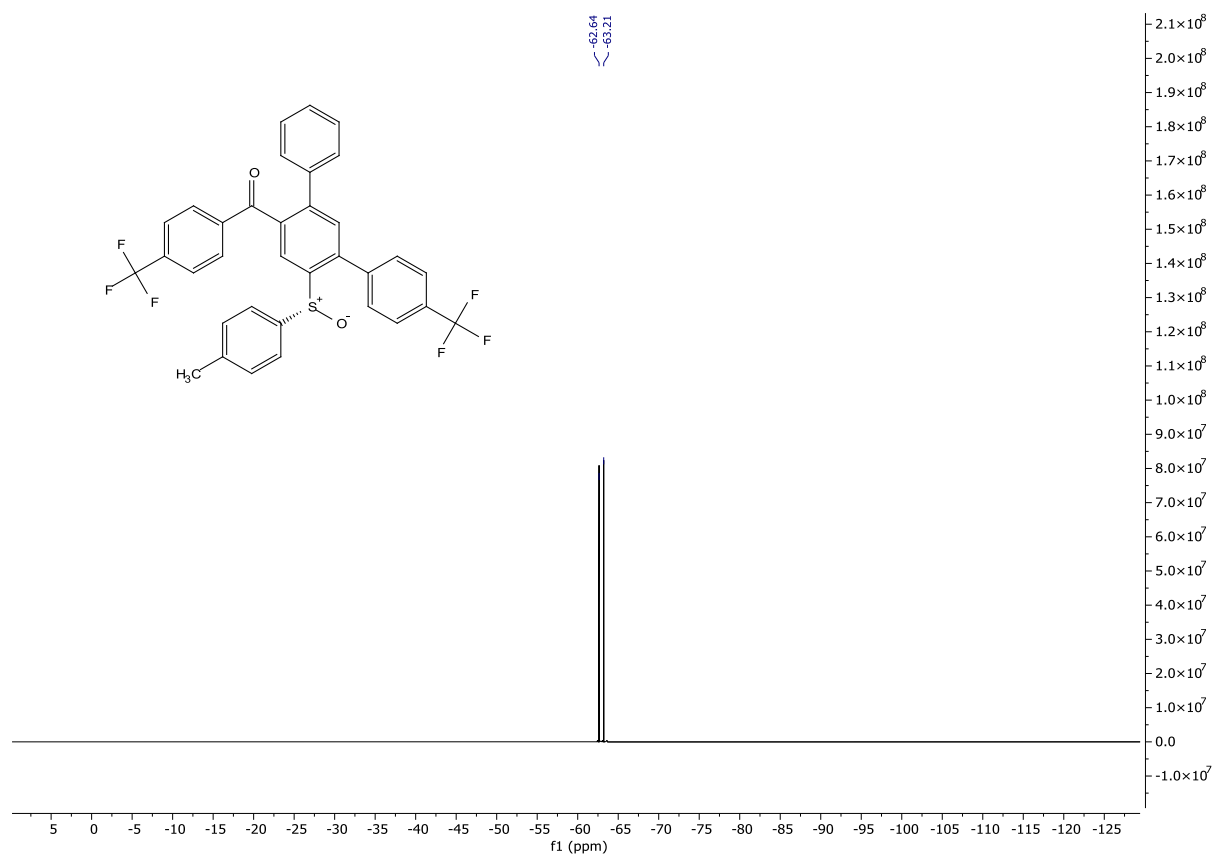

**Figure 9.**  $^{19}\text{F}$  NMR (471 MHz, Chloroform-*d*) of compound 10d.

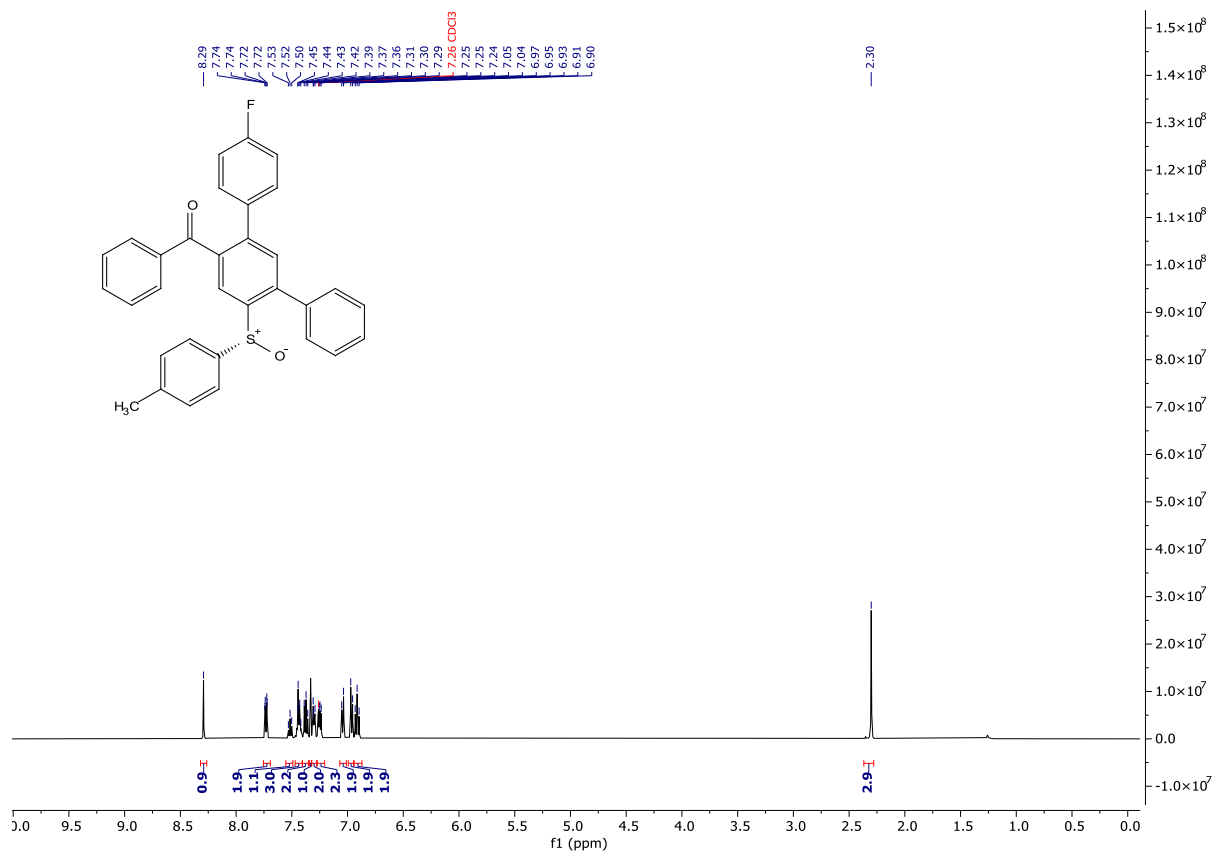

Figure 10. <sup>1</sup>H NMR (500 MHz, Chloroform-*d*) of compound 10e.

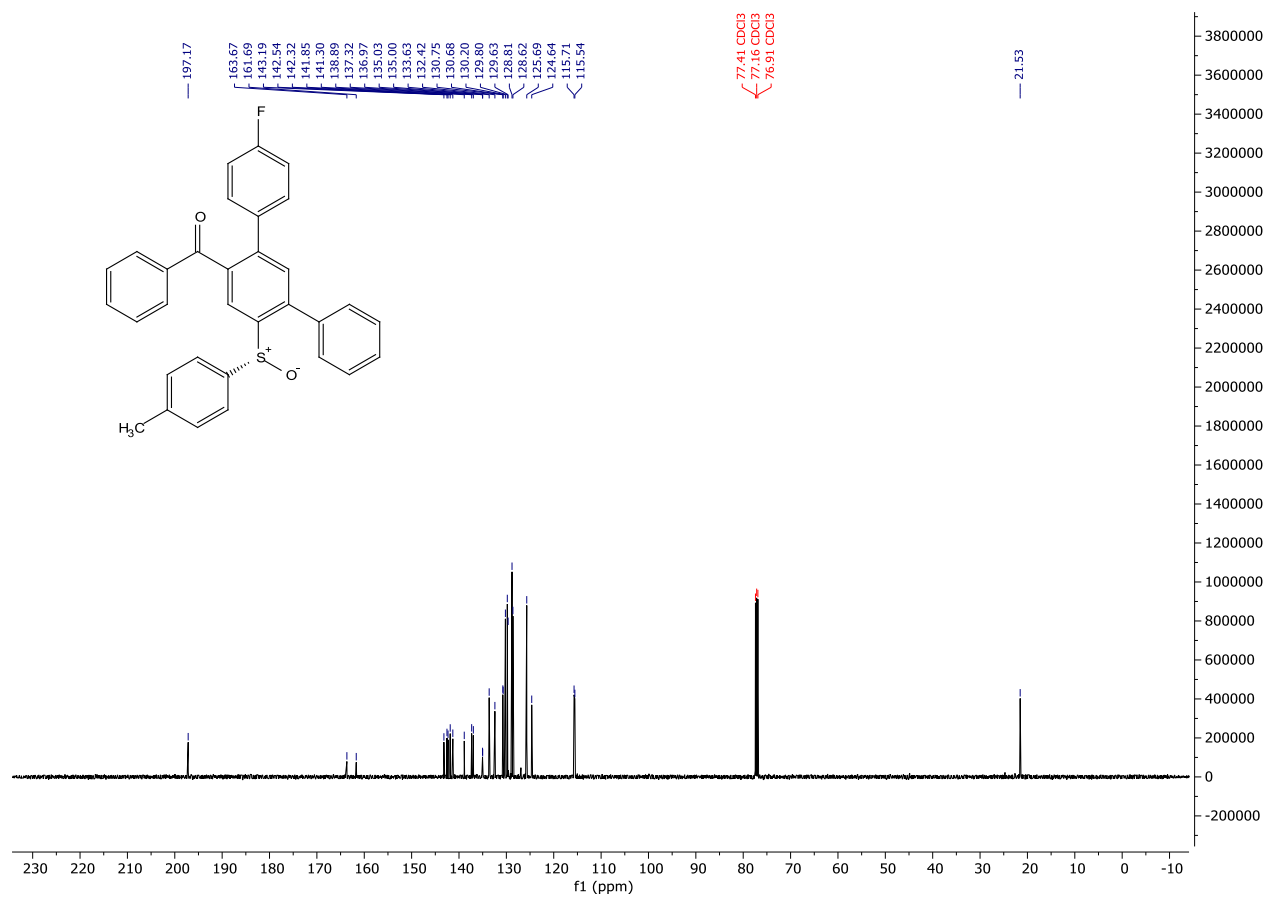

Figure 11. <sup>13</sup>C NMR (126 MHz, Chloroform-*d*) of compound 10e.

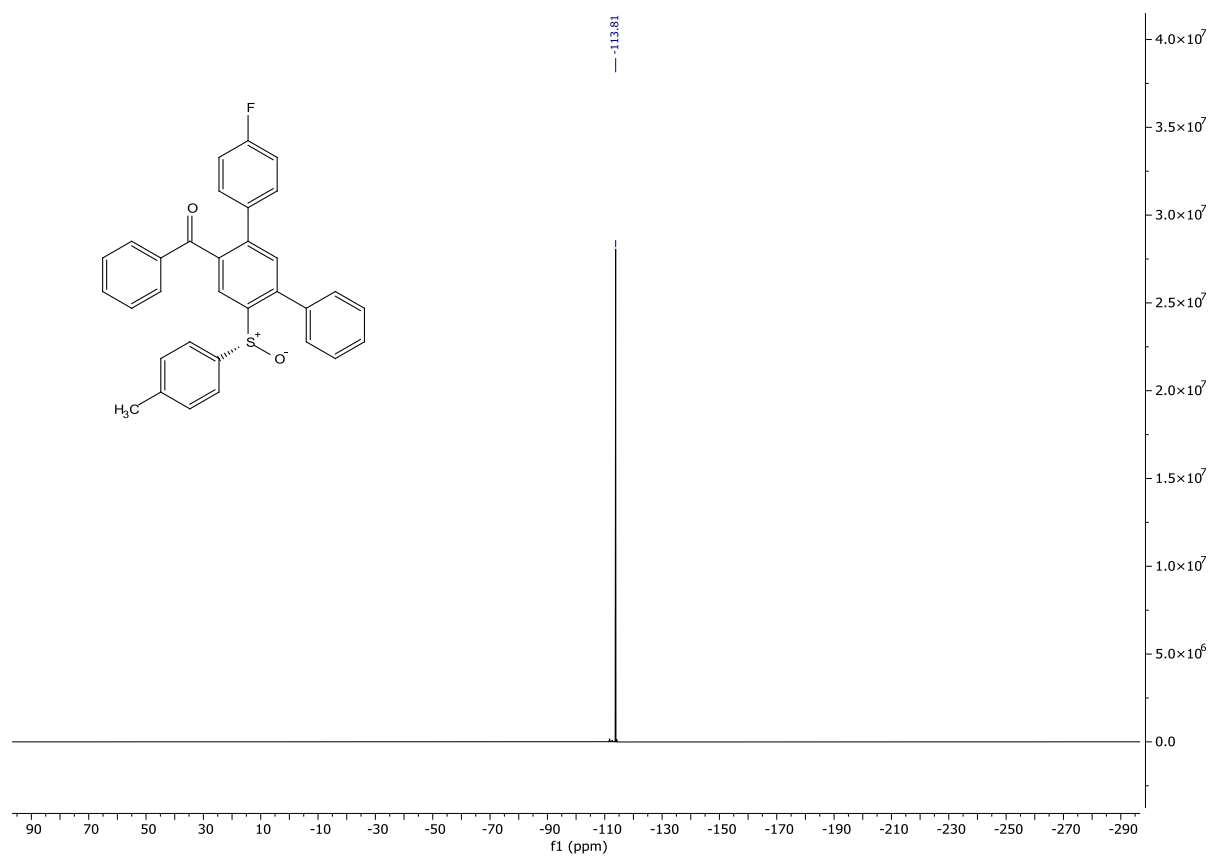

**Figure 12.**  $^{19}\text{F}$  NMR (471 MHz, Chloroform-*d*) of compound 10e.

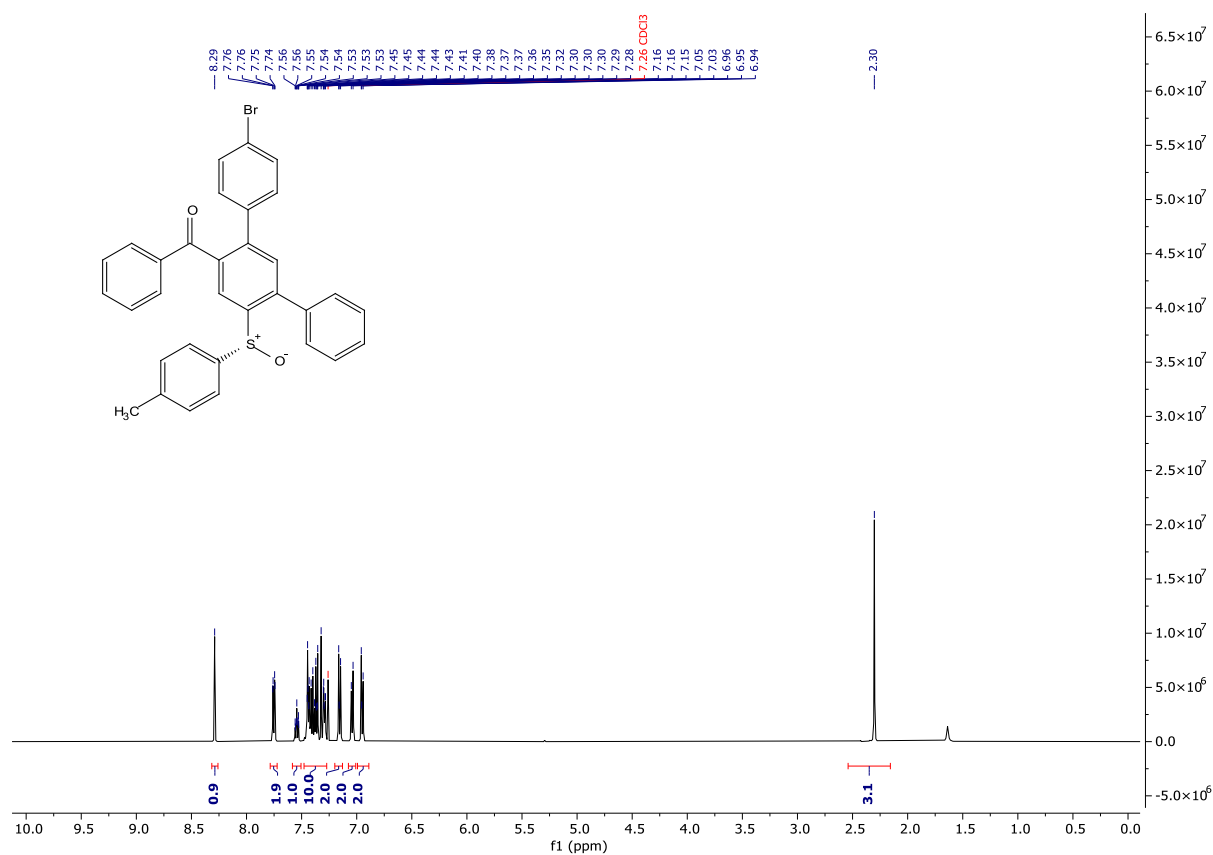

Figure 13. <sup>1</sup>H NMR (500 MHz, Chloroform-*d*) of compound 10f.

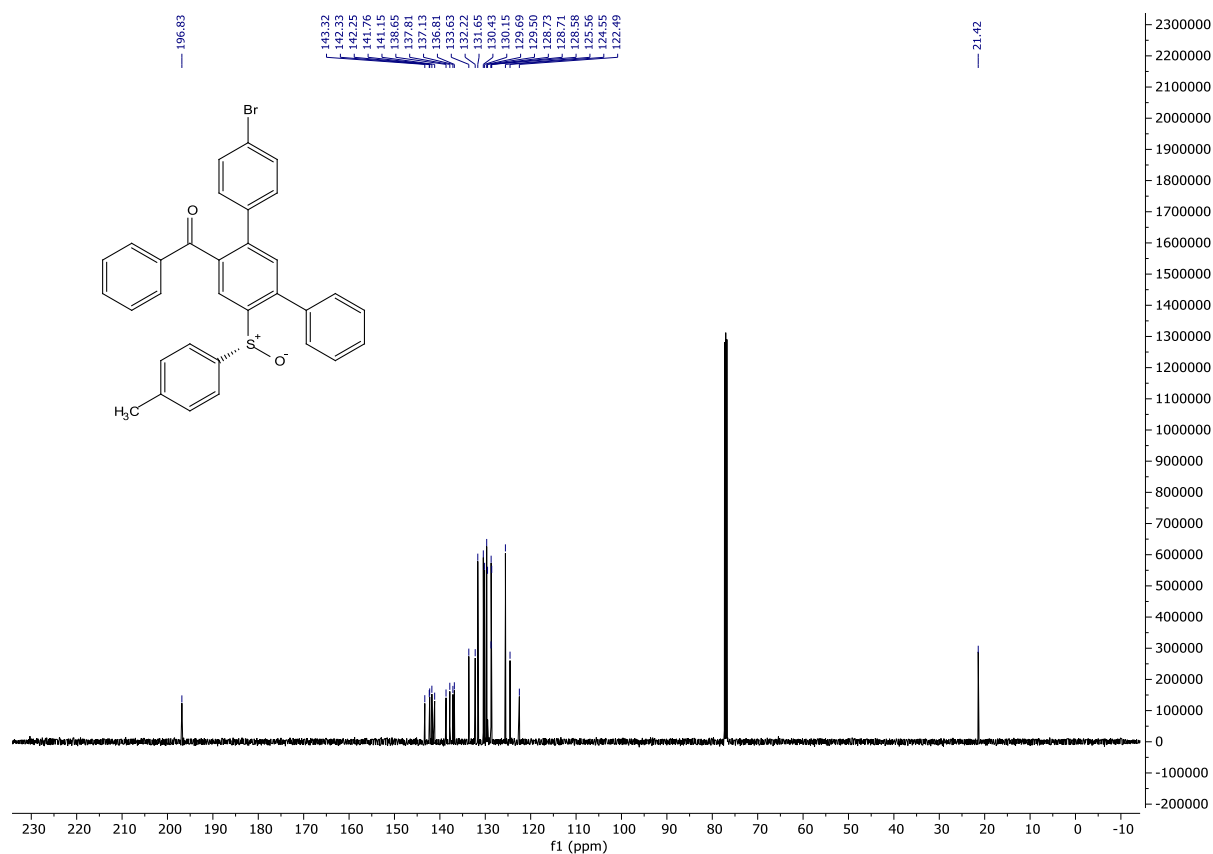

Figure 14. <sup>13</sup>C NMR (126 MHz, Chloroform-*d*) of compound 10f.

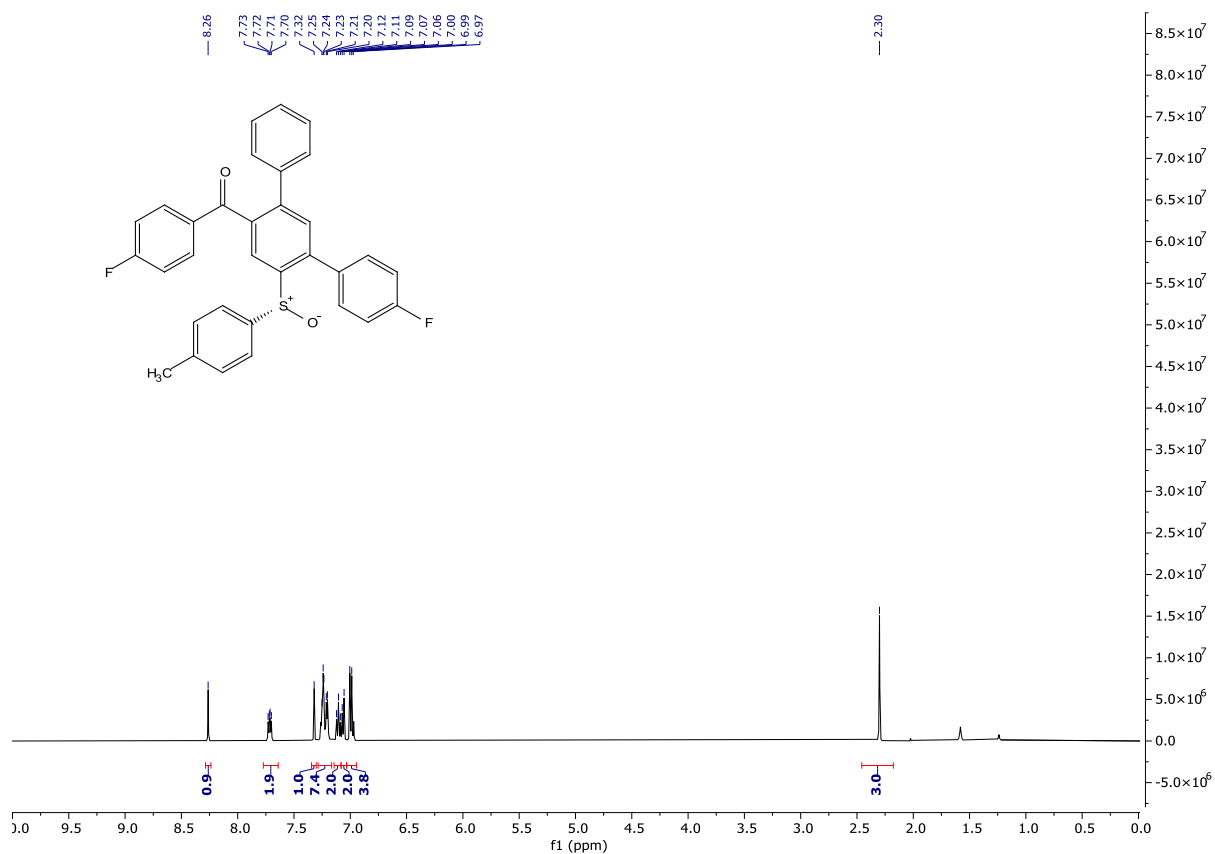

Figure 15. <sup>1</sup>H NMR (500 MHz, Chloroform-*d*) of compound 10g.

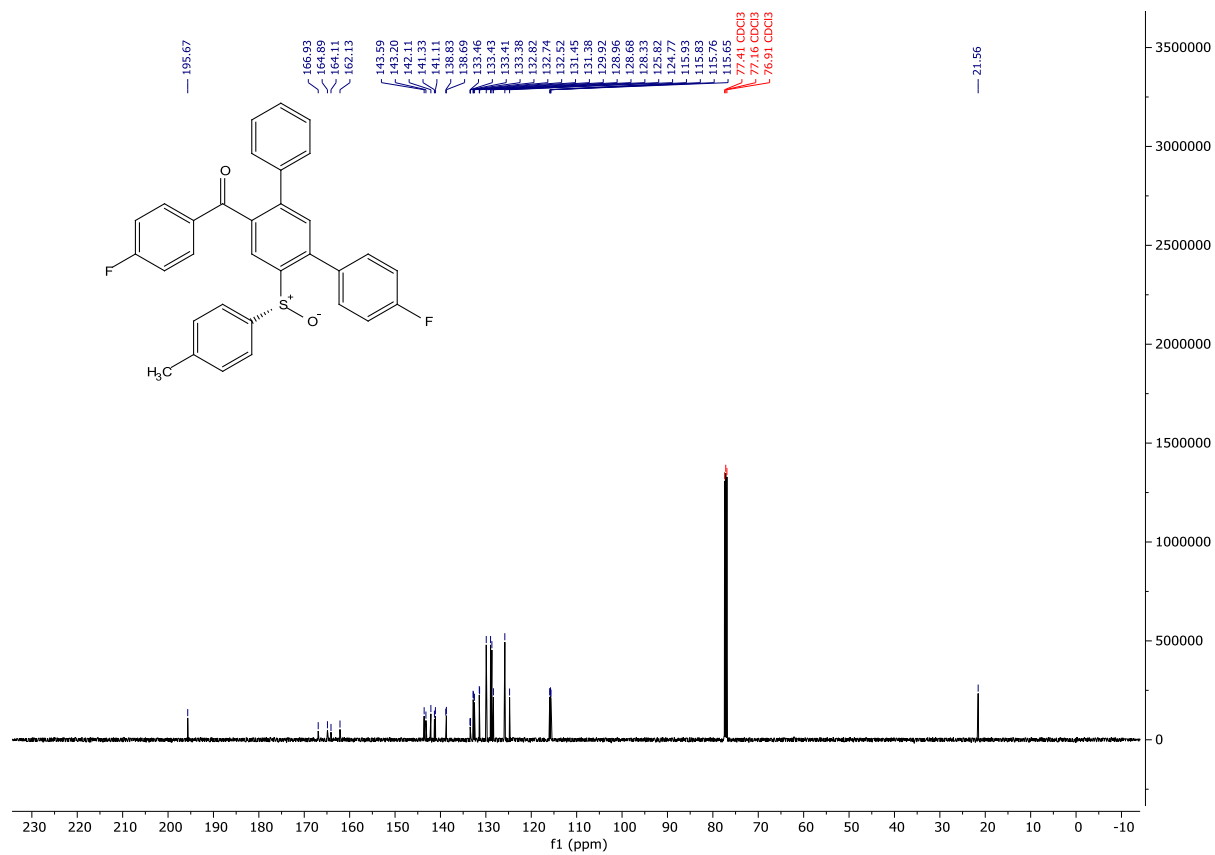

Figure 16. <sup>13</sup>C NMR (126 MHz, Chloroform-*d*) of compound 10g.

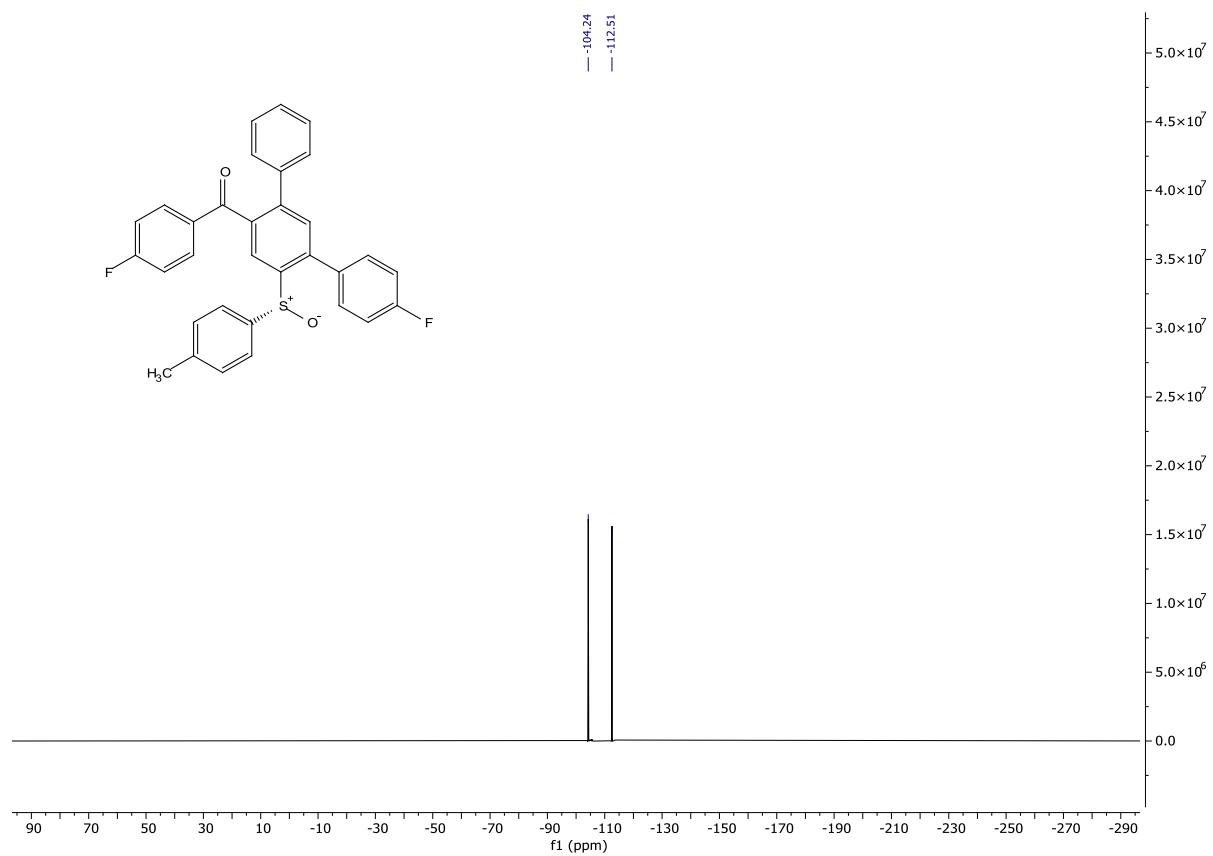

**Figure 17.**  $^{19}\text{F}$  NMR (471 MHz, Chloroform-*d*) of compound 10g.



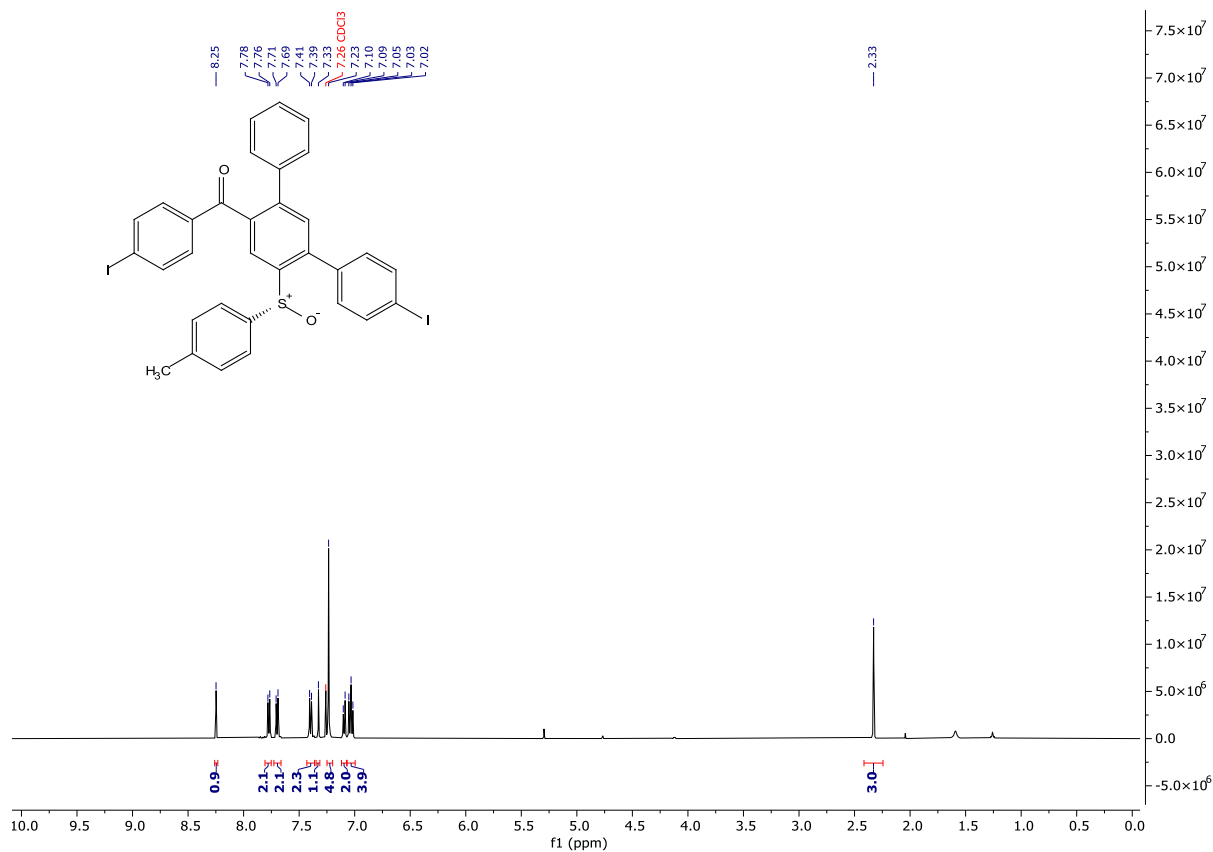

Figure 20. <sup>1</sup>H NMR (500 MHz, Chloroform-*d*) of compound 10i.

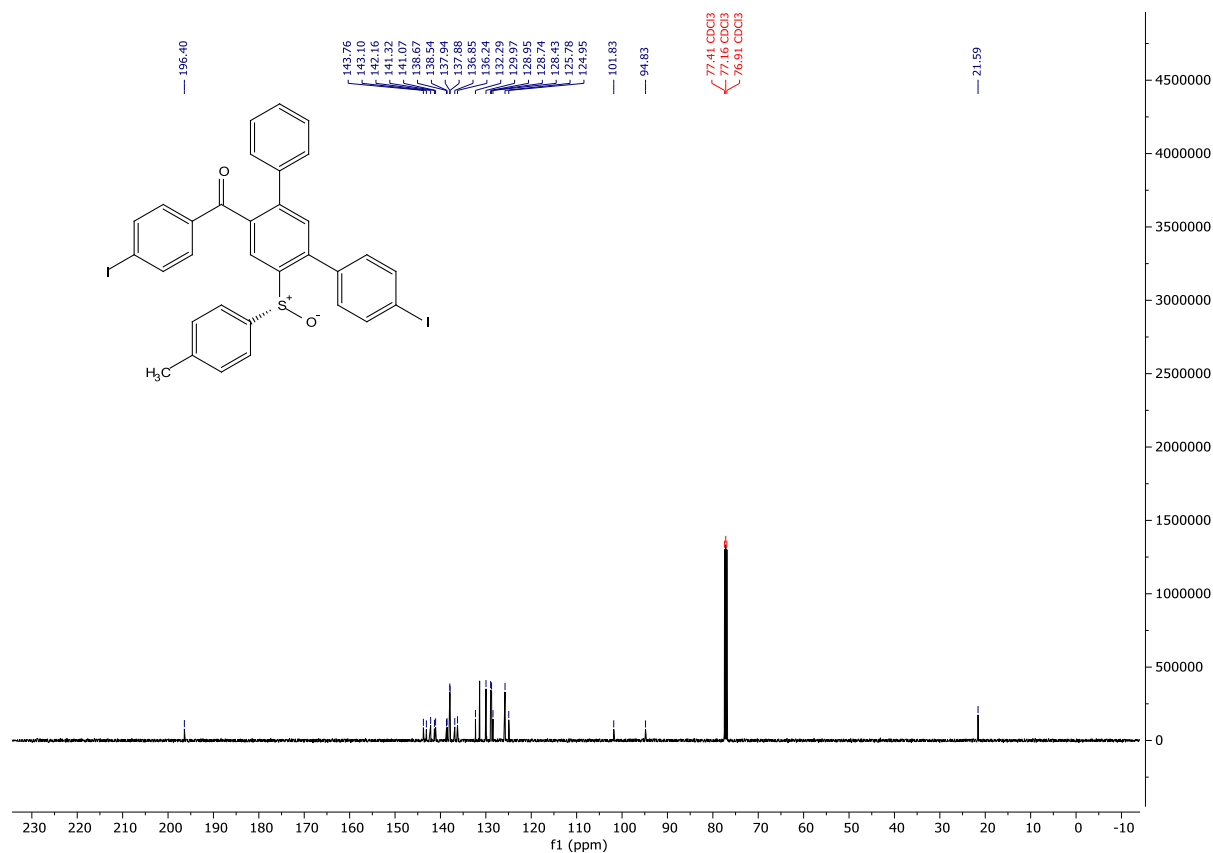

Figure 21. <sup>13</sup>C NMR (126 MHz, Chloroform-*d*) of compound 10i.

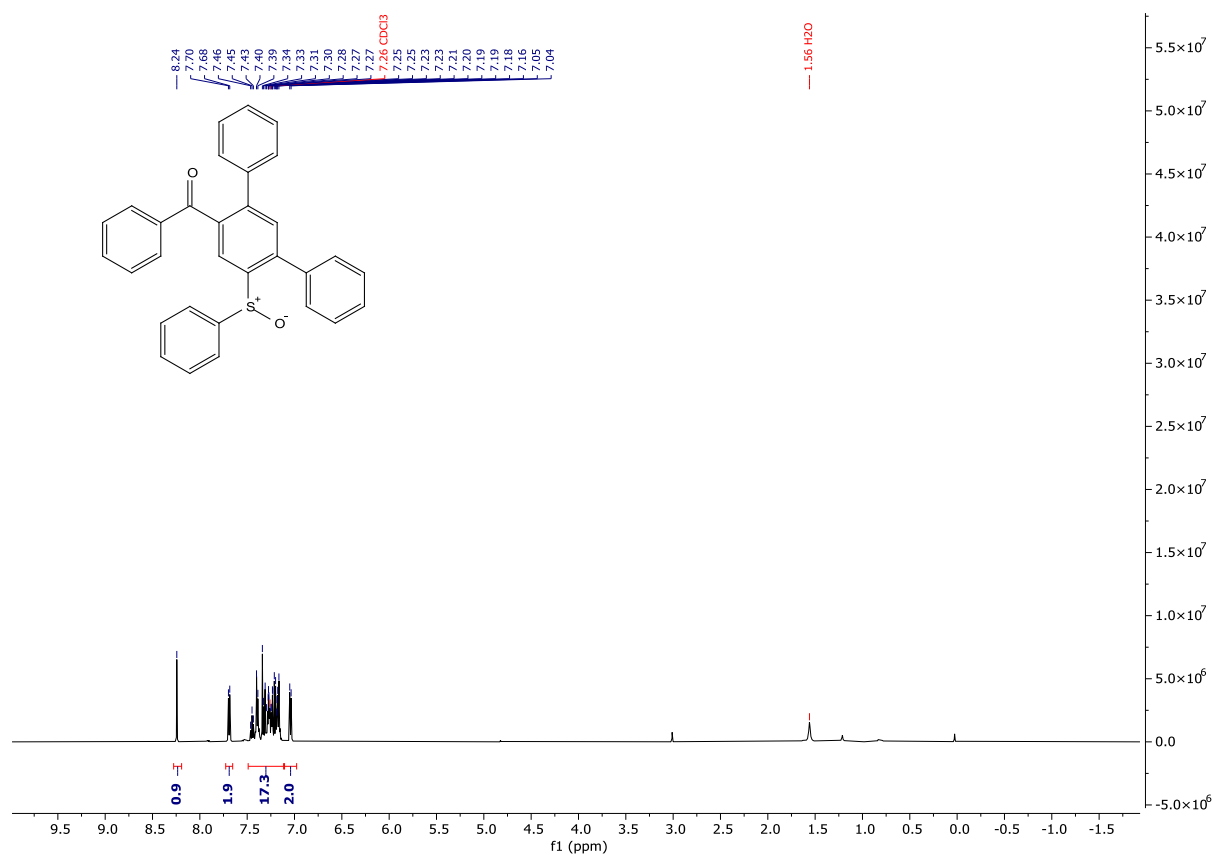

Figure 22. <sup>1</sup>H NMR (500 MHz, Chloroform-d) of compound 10j.

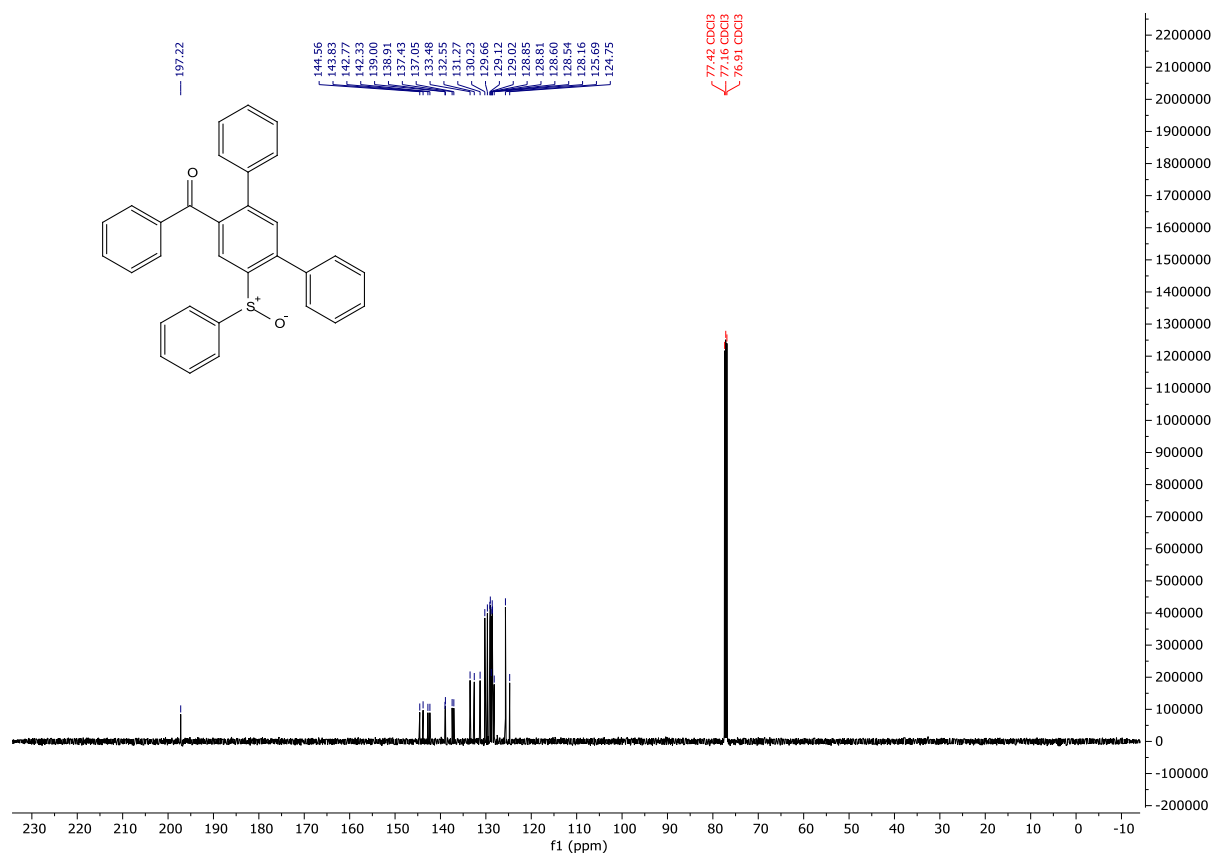

Figure 23. <sup>13</sup>C NMR (126 MHz, Chloroform-d) of compound 10j.

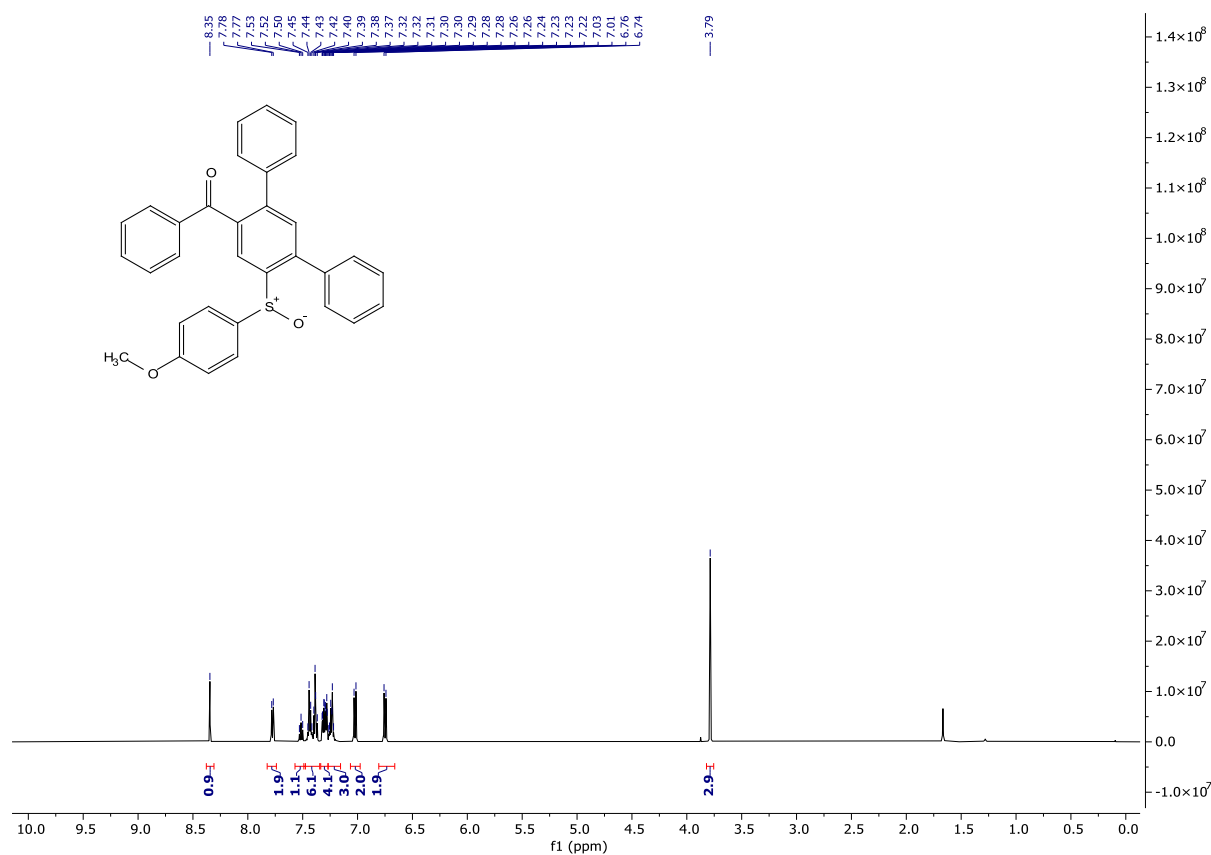

Figure 24. <sup>1</sup>H NMR (500 MHz, Chloroform-*d*) of compound 10k.

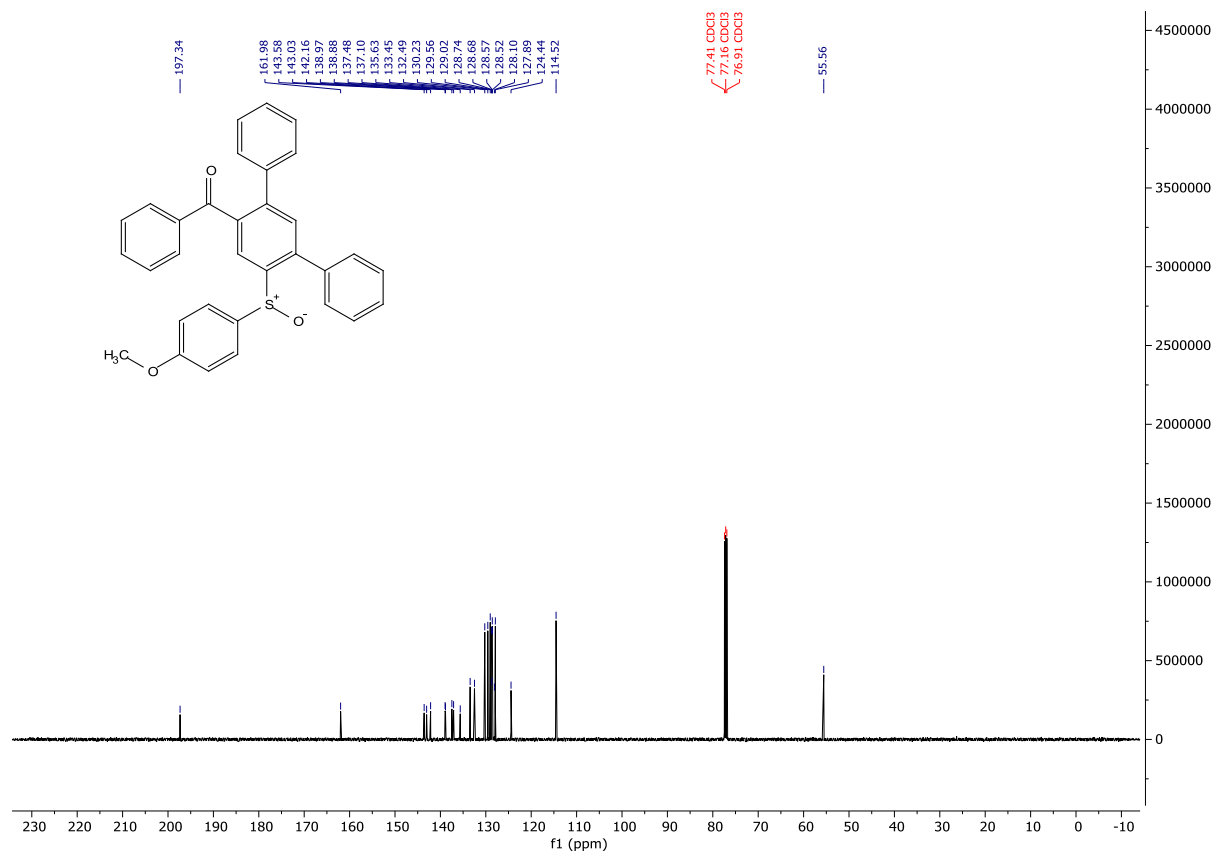

Figure 25. <sup>13</sup>C NMR (126 MHz, Chloroform-*d*) of compound 10k.

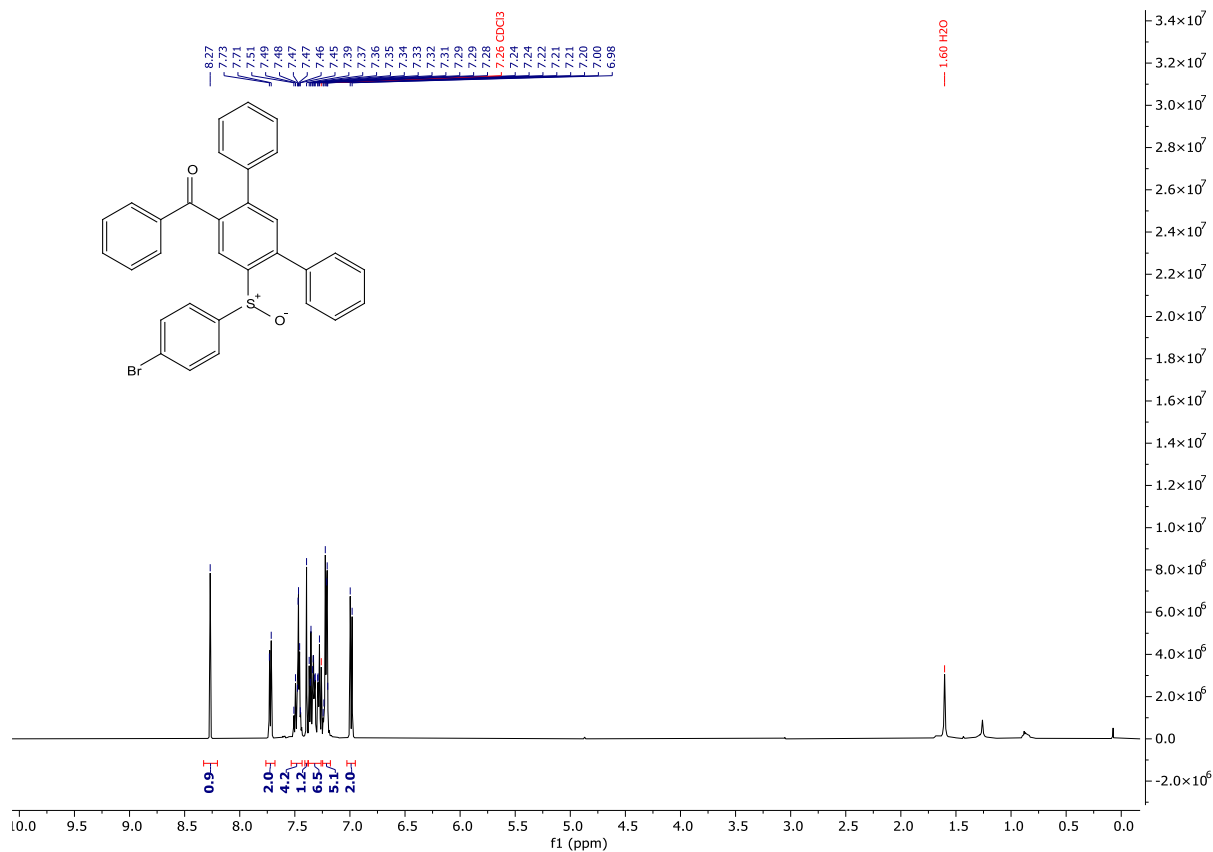

Figure 26. <sup>1</sup>H NMR (500 MHz, Chloroform-*d*) of compound 10l.

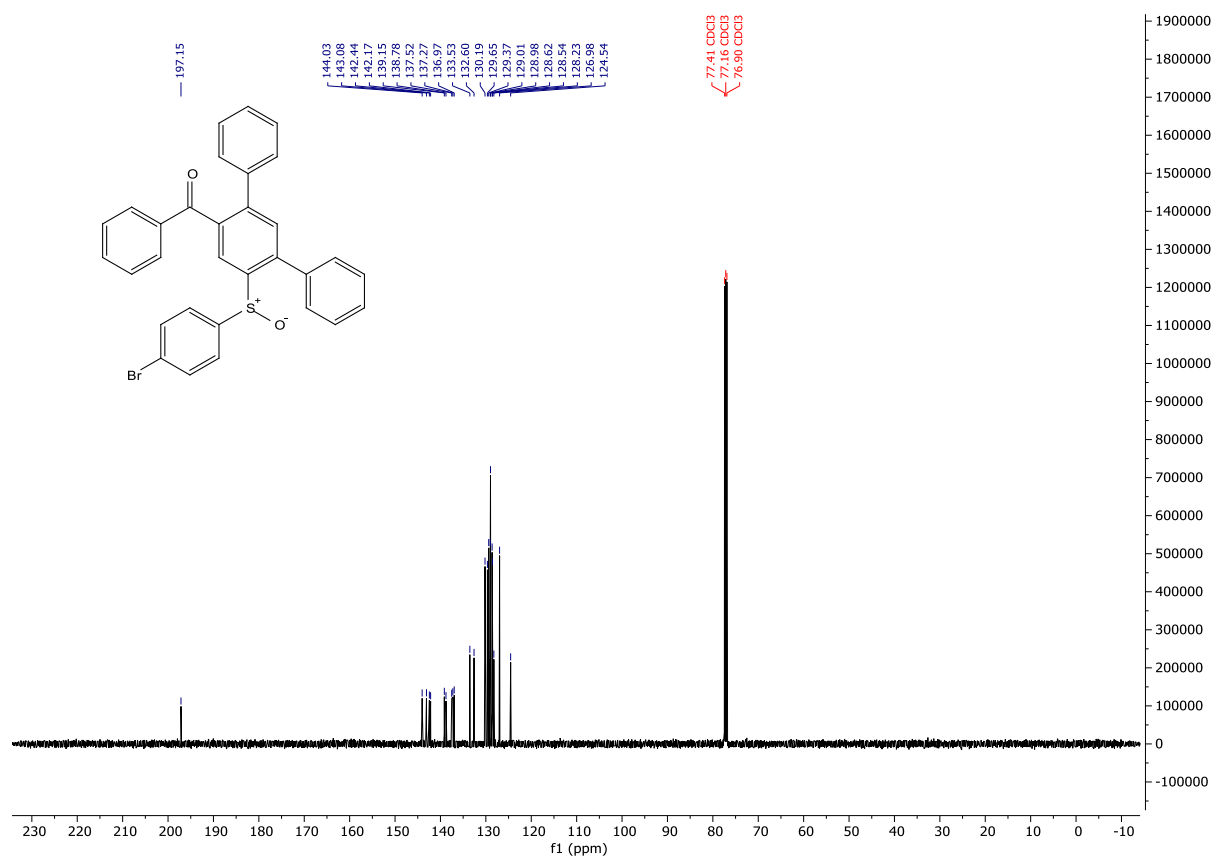

Figure 27. <sup>13</sup>C NMR (126 MHz, Chloroform-*d*) of compound 10l.

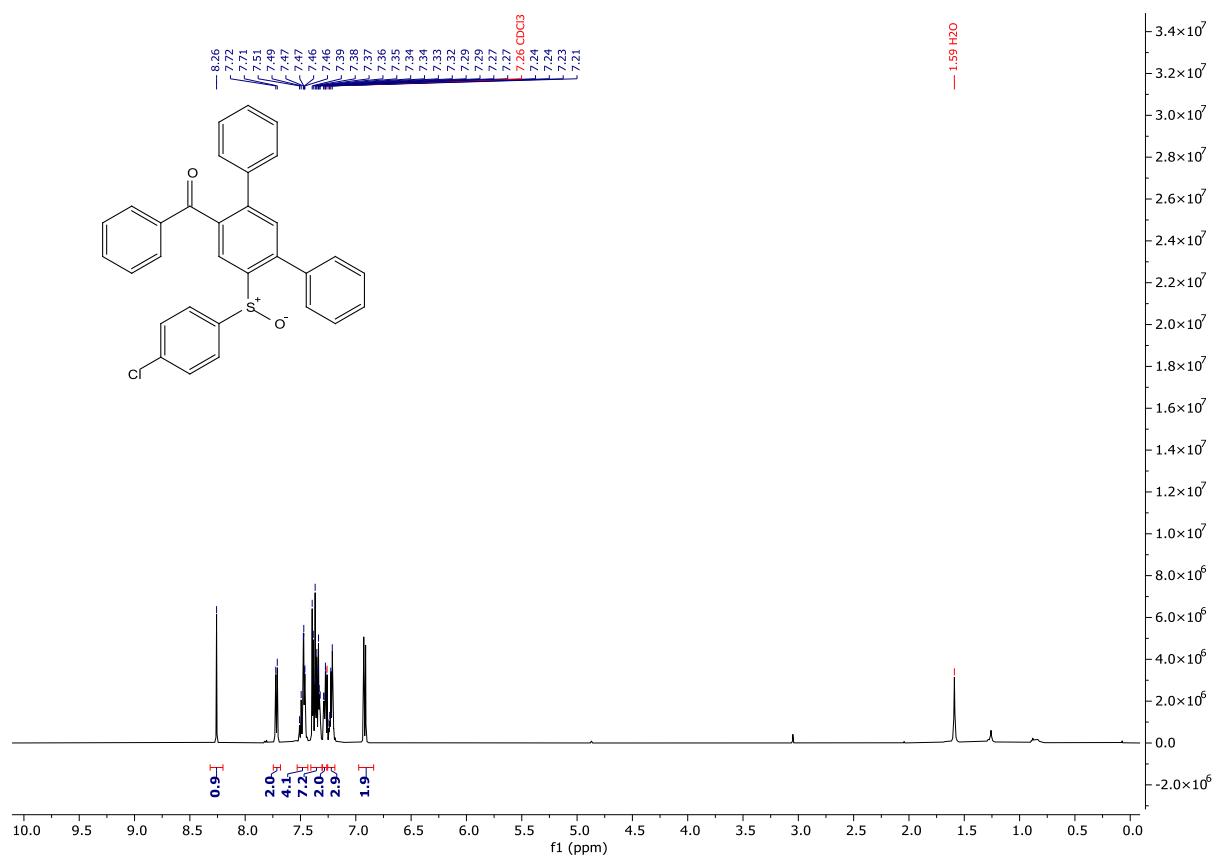

Figure 28. <sup>1</sup>H NMR (500 MHz, Chloroform-*d*) of compound 10m.

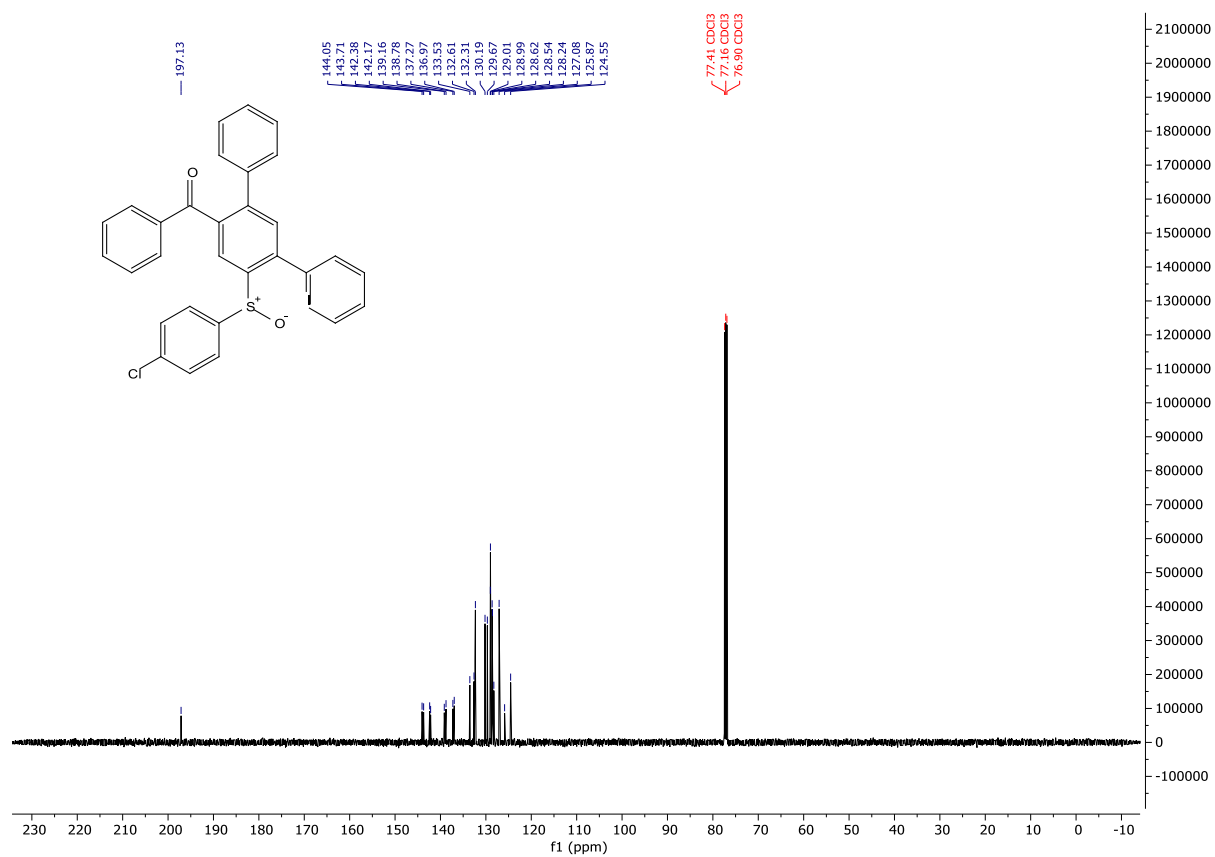

Figure 29. <sup>13</sup>C NMR (126 MHz, Chloroform-*d*) of compound 10m.

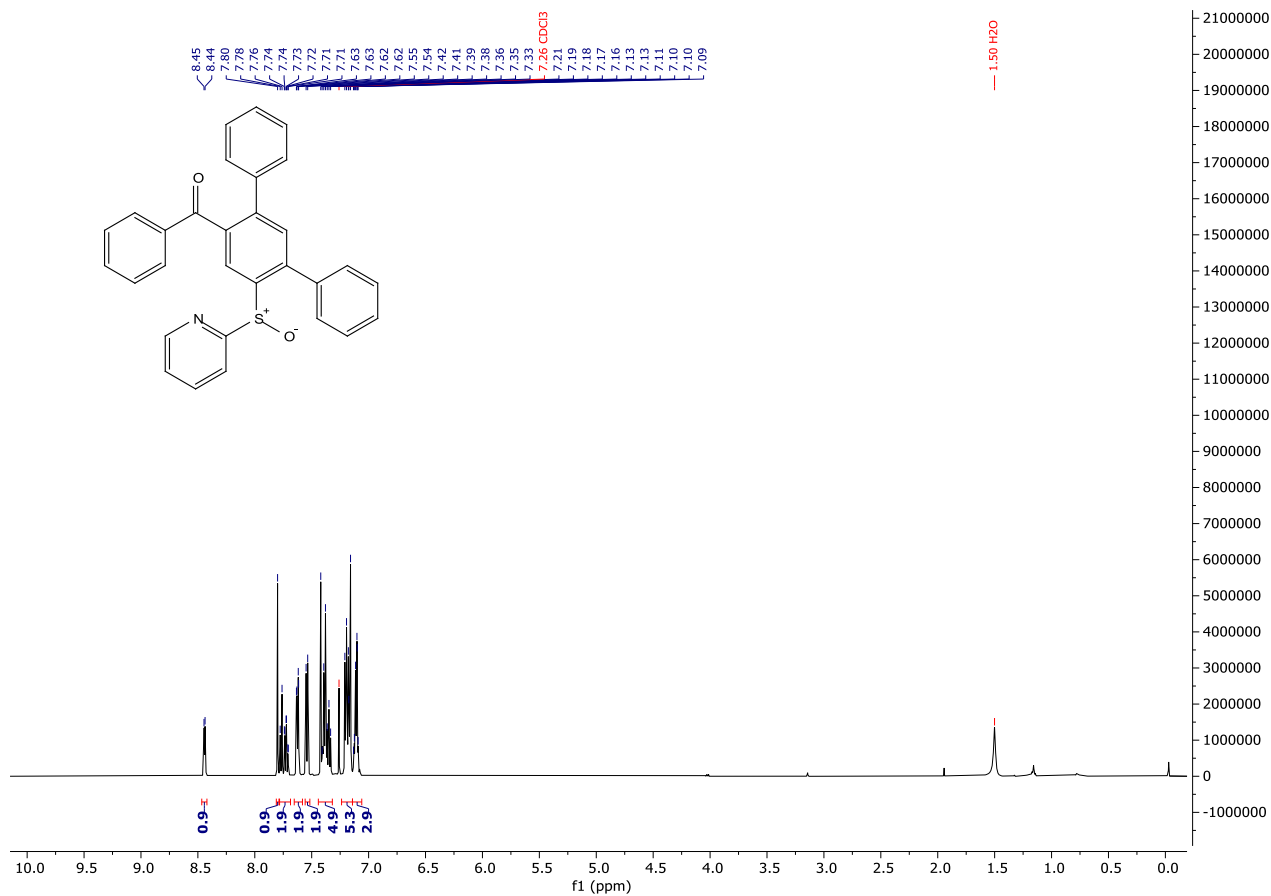

Figure 30. <sup>1</sup>H NMR (500 MHz, Chloroform-d) of compound 10n.

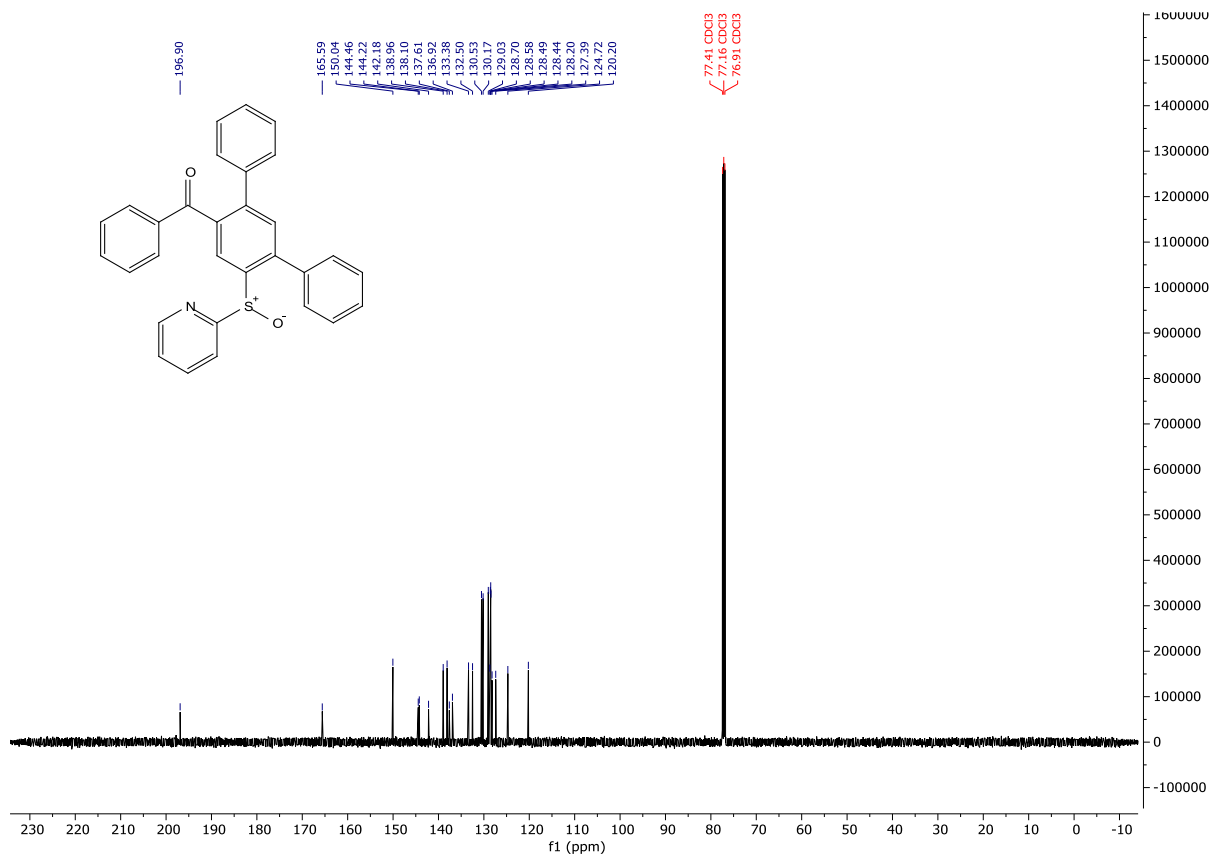

Figure 31. <sup>13</sup>C NMR (126 MHz, Chloroform-d) of compound 10n.

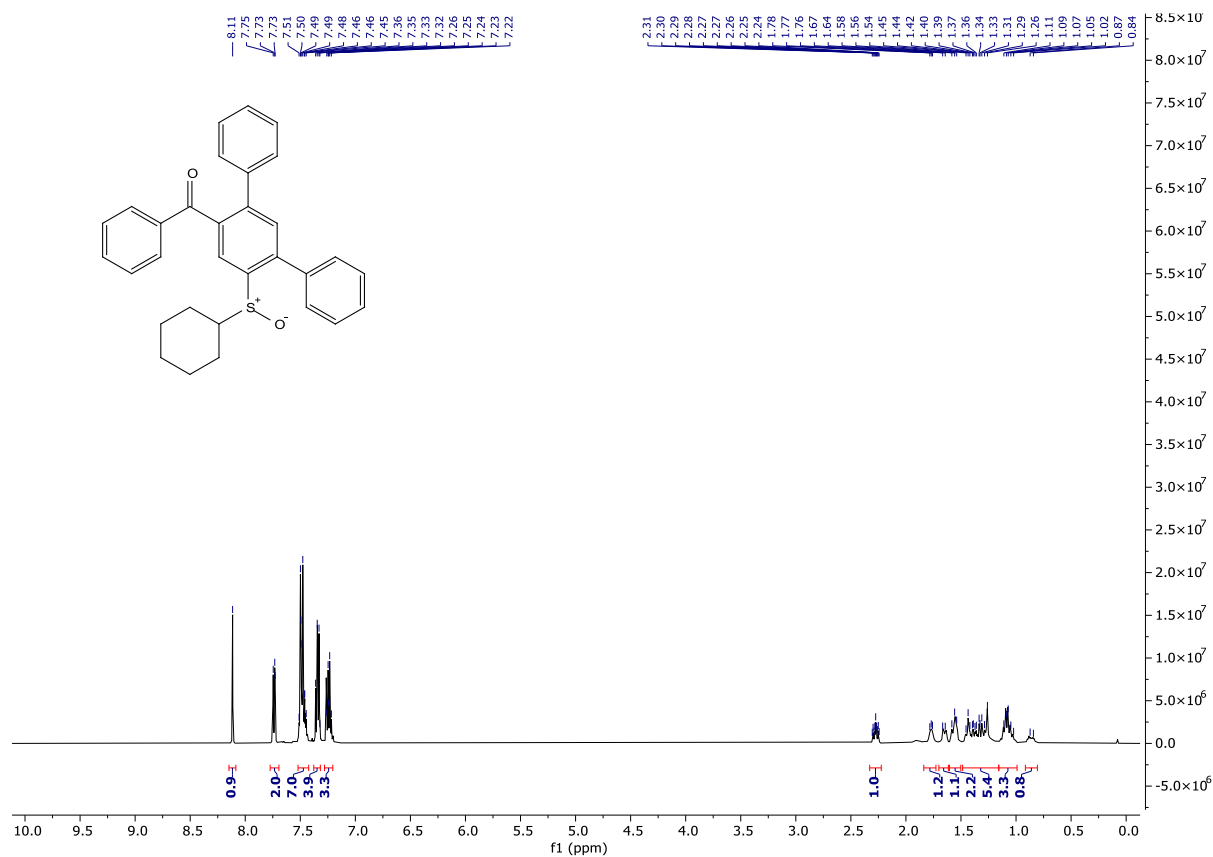

Figure 32. <sup>1</sup>H NMR (500 MHz, Chloroform-*d*) of compound 10o.

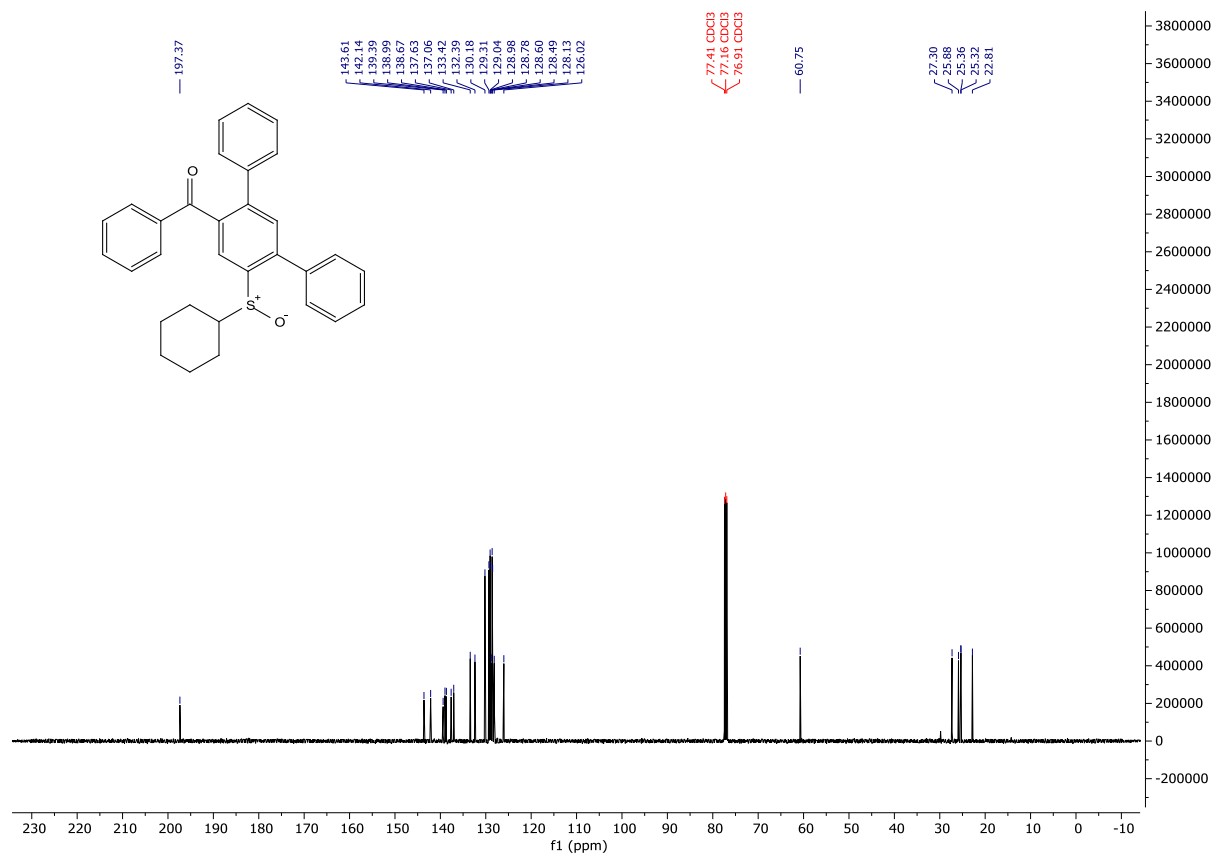

Figure 33. <sup>13</sup>C NMR (126 MHz, Chloroform-*d*) of compound 10o.

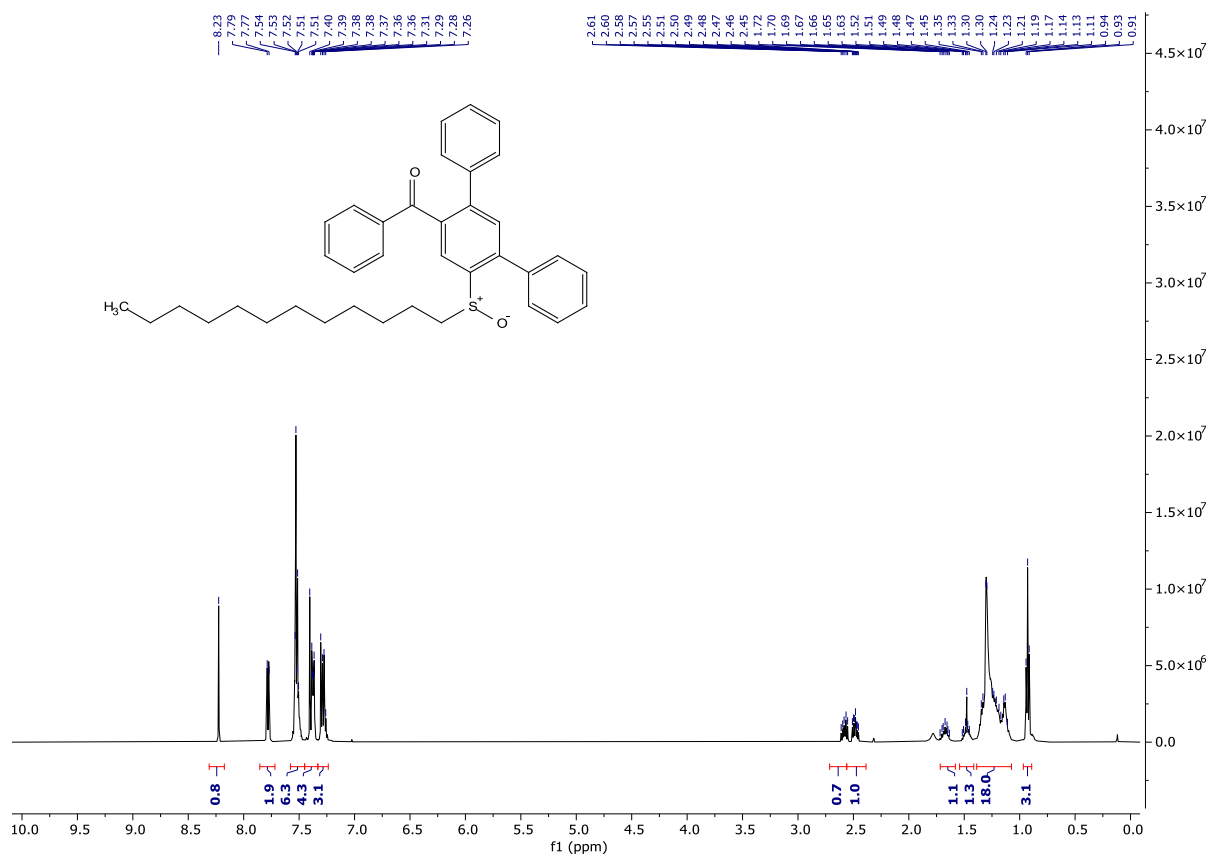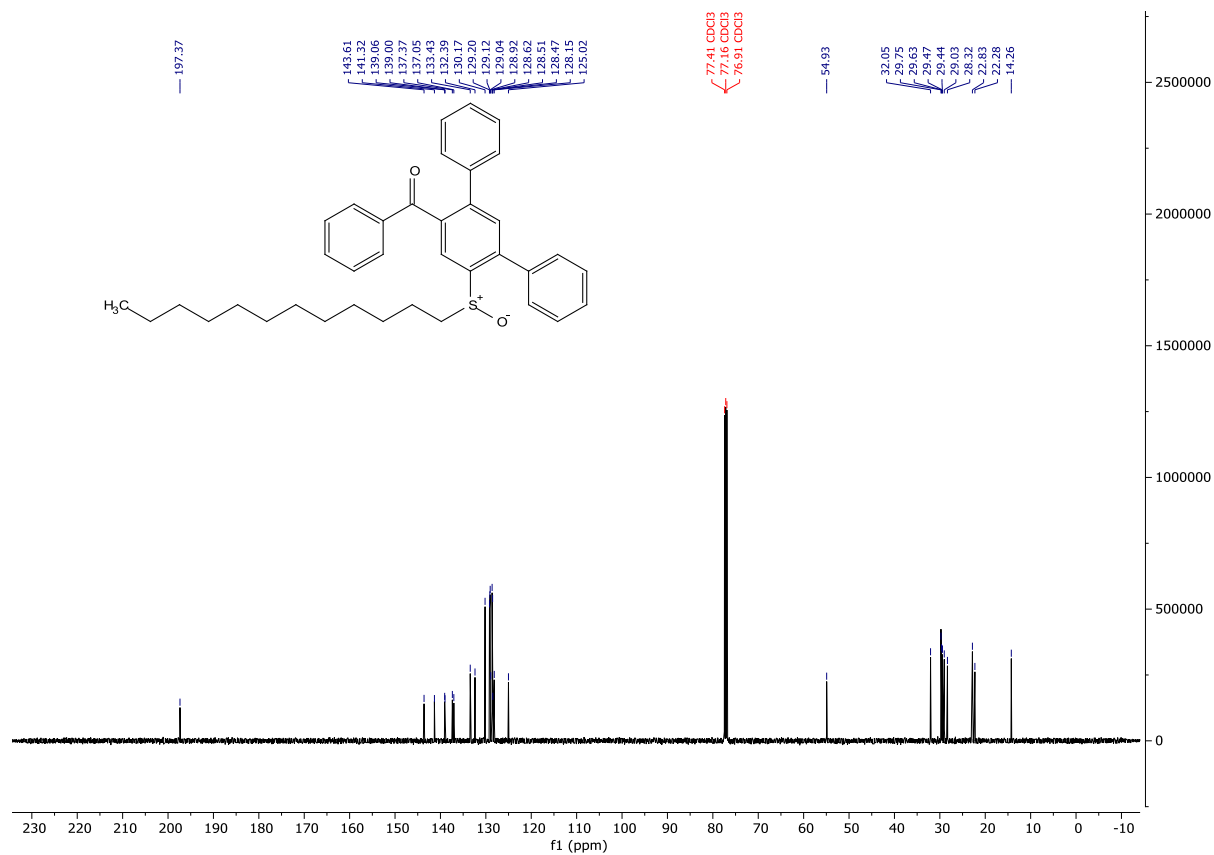

## Crystal structure data of compound 10a

**Table 1:** Crystallographic data

|                                                                         |                                                                |
|-------------------------------------------------------------------------|----------------------------------------------------------------|
| Molecular formula                                                       | C <sub>32</sub> H <sub>24</sub> O <sub>2</sub> S               |
| Space group                                                             | <i>P</i> 2 <sub>1</sub> 2 <sub>1</sub> 2 <sub>1</sub> (Nr. 19) |
| Crystal system                                                          | Orthorhombisch                                                 |
| Number of formula units, <i>Z</i>                                       | 4                                                              |
| Temperature/K                                                           | 213,6(2)                                                       |
| <i>a</i> /pm                                                            | 949,9(2)                                                       |
| <i>b</i> /pm                                                            | 1464,9(3)                                                      |
| <i>c</i> /pm                                                            | 1739,5(4)                                                      |
| <i>V</i> /10 <sup>6</sup> pm <sup>3</sup>                               | 2420,6(8)                                                      |
| Wave length/pm                                                          | 71,073                                                         |
| Diffractometer                                                          | IPDS II, Fa. Stoe & Cie GmbH, Darmstadt                        |
| Number of measured reflexes                                             | 35706                                                          |
| Number of independent reflexes                                          | 6482                                                           |
| Number of refined parameters                                            | 319                                                            |
| δ <sub>min</sub> /δ <sub>max</sub> (e/10 <sup>6</sup> pm <sup>3</sup> ) | -0,20/0,218                                                    |
| Absolute structure, flack parameter                                     | 1,09(10)                                                       |
| R <sub>1</sub> (F <sub>o</sub> > 4 σ)                                   | 0,0586                                                         |
| R <sub>1</sub> (all reflexes)                                           | 0,2697                                                         |
| wR <sub>2</sub>                                                         | 0,0728                                                         |
| GoF                                                                     | 0,753                                                          |

**Table 2:** Position parameters and isotropic thermal deflection parameters. The standard deviations (in parentheses) refer to the last decimal place.

| Atom | <i>x/a</i> | <i>y/b</i> | <i>z/c</i> | U <sub>iso</sub> |
|------|------------|------------|------------|------------------|
| S1   | 0,2774(2)  | 0,43277(7) | 0,91833(8) | 0,0464(4)        |
| O2   | 0,4311(3)  | 0,4167(2)  | 0,9082(2)  | 0,060(1)         |
| O3   | 0,4983(3)  | 0,7705(2)  | 0,0200(2)  | 0,064(1)         |
| C1   | 0,1306(5)  | 0,5942(2)  | 0,0918(2)  | 0,034(1)         |
| H1   | 0,0506     | 0,6006     | 0,1222     | 0,041            |
| C4   | 0,2236(5)  | 0,5062(3)  | 0,8412(3)  | 0,038(1)         |
| C5   | 0,2579(5)  | 0,5145(2)  | 0,9947(2)  | 0,032(1)         |
| C6   | 0,2123(5)  | 0,8220(3)  | 0,1263(2)  | 0,039(1)         |
| H6   | 0,2266     | 0,8328     | 0,0741     | 0,048            |
| C7   | 0,4859(5)  | 0,7072(3)  | 0,0649(3)  | 0,040(1)         |
| C8   | 0,2782(5)  | 0,5776(3)  | 0,7227(3)  | 0,050(2)         |
| H8   | 0,3434     | 0,5909     | 0,6844     | 0,060            |
| C9   | 0,2408(5)  | 0,6550(2)  | 0,1012(2)  | 0,029(1)         |
| C10  | 0,7197(5)  | 0,7376(3)  | 0,1206(3)  | 0,046(2)         |
| H10  | 0,7345     | 0,7795     | 0,0812     | 0,055            |
| C11  | 0,1450(6)  | 0,6086(3)  | 0,7154(3)  | 0,043(1)         |
| C12  | 0,2222(5)  | 0,7336(3)  | 0,1548(3)  | 0,035(1)         |
| C13  | 0,0093(5)  | 0,4653(3)  | 0,0284(2)  | 0,033(1)         |
| C14  | 0,1362(5)  | 0,5237(3)  | 0,0381(2)  | 0,033(1)         |
| C15  | 0,3198(5)  | 0,5269(3)  | 0,7850(3)  | 0,044(2)         |
| H15  | 0,4123     | 0,5068     | 0,7891     | 0,053            |
| C16  | 0,8232(5)  | 0,7238(3)  | 0,1751(3)  | 0,0510(2)        |

|      |            |            |           |          |
|------|------------|------------|-----------|----------|
| H16  | 0,9078     | 0,7556     | 0,1720    | 0,061    |
| C17  | 0,5951(5)  | 0,6901(3)  | 0,1239(3) | 0,035(1) |
| C18  | 0,3630(5)  | 0,6434(3)  | 0,0591(2) | 0,033(1) |
| C19  | 0,0181(5)  | 0,3703(3)  | 0,0264(2) | 0,039(1) |
| H19  | 0,1049     | 0,3418     | 0,0323    | 0,047    |
| C20  | -0,1021(5) | 0,3185(3)  | 0,0158(3) | 0,049(2) |
| H20  | -0,0956    | 0,2551     | 0,0144    | 0,058    |
| C21  | -0,1208(5) | 0,05046(3) | 0,0220(2) | 0,043(1) |
| H21  | -0,1288    | 0,5677     | 0,0253    | 0,052    |
| C22  | 0,2015(5)  | 0,7192(3)  | 0,2319(3) | 0,047(2) |
| H22  | 0,2054     | 0,6603     | 0,2517    | 0,056    |
| C23  | 0,8007(5)  | 0,6631(3)  | 0,2339(3) | 0,060(2) |
| H23  | 0,8692     | 0,6549     | 0,2716    | 0,072    |
| C24  | 0,0480(5)  | 0,5900(3)  | 0,7729(3) | 0,054(2) |
| H24  | -0,0434    | 0,6124     | 0,7697    | 0,064    |
| C25  | 0,1745(5)  | 0,7929(3)  | 0,2809(3) | 0,057(2) |
| H25  | 0,1643     | 0,7829     | 0,3334    | 0,069    |
| C26  | 0,1814(5)  | 0,8937(3)  | 0,1745(3) | 0,055(2) |
| H26  | 0,1729     | 0,9524     | 0,1547    | 0,066    |
| C27  | 0,0891(5)  | 0,5383(3)  | 0,8345(3) | 0,048(2) |
| H27  | 0,0238     | 0,5246     | 0,8727    | 0,058    |
| C28  | -0,2402(5) | 0,4527(3)  | 0,0108(3) | 0,058(2) |
| H28  | -0,3273    | 0,4810     | 0,0056    | 0,070    |
| C29  | 0,6766(6)  | 0,6141(3)  | 0,2374(3) | 0,065(2) |
| H29  | 0,6620     | 0,5721     | 0,2767    | 0,077    |
| C30  | 0,3694(4)  | 0,5739(3)  | 0,0054(2) | 0,035(1) |
| H30  | 0,4503     | 0,5669     | 0,9759    | 0,042    |
| C31  | 0,5743(5)  | 0,6280(3)  | 0,1821(2) | 0,048(2) |
| H31  | 0,4907     | 0,5951     | 0,1843    | 0,058    |
| C32  | 0,0969(5)  | 0,6654(3)  | 0,6474(3) | 0,075(2) |
| H32A | 0,1448     | 0,6453     | 0,6018    | 0,112    |
| H32B | 0,1183     | 0,7285     | 0,6567    | 0,112    |
| H32C | -0,0028    | 0,6583     | 0,6406    | 0,112    |
| C33  | -0,2303(6) | 0,3598(3)  | 0,0074(3) | 0,059(2) |
| H33  | -0,3106    | 0,3246     | 0,9994    | 0,071    |
| C34  | 0,1629(5)  | 0,8789(3)  | 0,2525(3) | 0,054(2) |
| H34  | 0,1428     | 0,9275     | 0,2851    | 0,065    |
